# Supplementary material for: Non-redundant Functions of ATM and DNA-PKcs in Response to DNA Double-Strand Breaks
Source: PubMed Central journal article supplement — Cell Rep. 2015 Nov 12;13(8):1598–609. doi: 10.1016/j.celrep.2015.10.024 (PMC4670905; doi:10.1016/j.celrep.2015.10.024), 2015-11-12
Supplement: mmc7.pdf [file mmc7.pdf]

## Non-redundant Functions of ATM and DNA-PKcs in Response to DNA Double-Strand Breaks

### Graphical Abstract

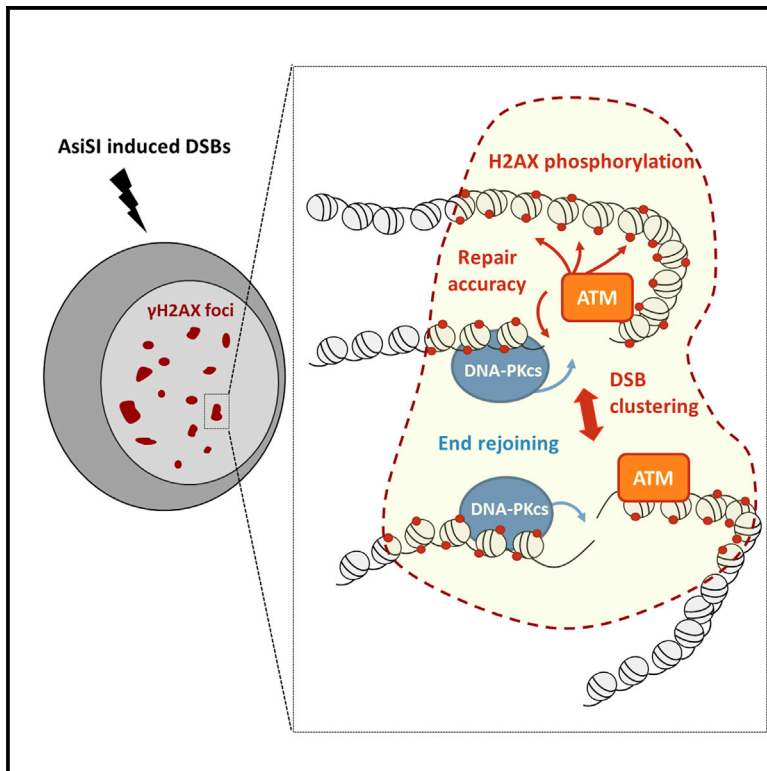

### Authors

Pierre Caron, Jonathan Choudjaye, Thomas Clouaire, ..., Alejandro Álvarez-Quilón, Felipe Cortés-Ledesma, Gaëlle Legube

### Correspondence

gaelle.legube@univ-tlse3.fr

### In Brief

By inducing multiple annotated DNA double-strand breaks in the human genome, Caron et al. show that two DNA damage response kinases, ATM and DNA-PKcs, are co-recruited at DSBs but exhibit non-redundant functions in promoting end joining, repair accuracy, H2AX phosphorylation, and DSB clustering.

### Highlights

- Both ATM and DNA-PKcs are recruited at AsiSI-induced DSBs
- Once recruited, both kinases exhibit complementary and non-redundant functions
- DNA-PKcs activity is required for end joining at all AsiSI-induced DSBs
- ATM activity promotes repair accuracy, H2AX phosphorylation, and DSB clustering

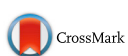

# Non-redundant Functions of ATM and DNA-PKcs in Response to DNA Double-Strand Breaks

Pierre Caron,<sup>1,2,5</sup> Jonathan Choudjaye,<sup>1,2,5</sup> Thomas Clouaire,<sup>1,2</sup> Béatrix Bugler,<sup>1,2</sup> Virginie Daburon,<sup>1,2</sup> Marion Aguirrebengoa,<sup>1,2</sup> Thomas Mangeat,<sup>1,2</sup> Jason S. Iacovoni,<sup>3</sup> Alejandro Álvarez-Quilón,<sup>4</sup> Felipe Cortés-Ledesma,<sup>4</sup> and Gaëlle Legube<sup>1,2,\*</sup>

<sup>1</sup>Université de Toulouse, UPS, LBCMCP, 118 route de Narbonne, 31062 Toulouse, France

<sup>2</sup>CNRS, LBCMCP, 31062 Toulouse, France

<sup>3</sup>Bioinformatic Plateau I2MC, INSERM and University of Toulouse, 1 Avenue Jean Poulhes, BP 84225, 31432 Toulouse Cedex 4, France

<sup>4</sup>Centro Andaluz de Biología Molecular y Medicina Regenerativa (CABIMER), CSIC-Universidad de Sevilla, Sevilla 41092, Spain

<sup>5</sup>Co-first author

\*Correspondence: [gaelle.legube@univ-tlse3.fr](mailto:gaelle.legube@univ-tlse3.fr)

<http://dx.doi.org/10.1016/j.celrep.2015.10.024>

This is an open access article under the CC BY-NC-ND license (<http://creativecommons.org/licenses/by-nc-nd/4.0/>).

## SUMMARY

DNA double-strand breaks (DSBs) elicit the so-called DNA damage response (DDR), largely relying on ataxia telangiectasia mutated (ATM) and DNA-dependent protein kinase (DNA-PKcs), two members of the PI3K-like kinase family, whose respective functions during the sequential steps of the DDR remains controversial. Using the DivA system (DSB inducible via *Asi/SI*) combined with high-resolution mapping and advanced microscopy, we uncovered that both ATM and DNA-PKcs spread in *cis* on a confined region surrounding DSBs, independently of the pathway used for repair. However, once recruited, these kinases exhibit non-overlapping functions on end joining and  $\gamma$ H2AX domain establishment. More specifically, we found that ATM is required to ensure the association of multiple DSBs within “repair foci.” Our results suggest that ATM acts not only on chromatin marks but also on higher-order chromatin organization to ensure repair accuracy and survival.

## INTRODUCTION

Among the various DNA damage types, DNA double-strand breaks (DSBs) are the most deleterious since they can lead to various mutations and chromosomal rearrangements linked to tumor initiation and progression. DSBs can both arise during development as part of scheduled processes, such as V(D)J and immunoglobulin class-switch recombination, and be generated by environmental stresses, such as pollutants and irradiation. DSBs are mainly repaired by two distinct pathways: homologous recombination (HR), involving extensive resection and utilizing an intact copy of the damaged locus, and non-homologous end joining (NHEJ), in which the two broken ends are able to be joined with no or minimal homology (reviewed in [Deriano and Roth, 2013](#); [Jasin and Rothstein, 2013](#)). Defects in

either repair pathway results in genome instability and can be lethal at very early developmental stages.

DSB detection rapidly elicits the so-called DNA damage response (DDR), which largely relies on the activity of the phosphatidylinositol 3-kinase (PI3K)-related kinases DNA-PKcs, ATM, and ATR (reviewed in [Sirbu and Cortez, 2013](#)). All three of these kinases have been found to be mutated in human disorders associated with genome instability: severe combined immunodeficiency (DNA-PKcs), ataxia telangiectasia (ATM), and Seckel syndrome (ATR). While DNA-PKcs and ATM have a function restricted to the DSB response, ATR is activated following a wider range of damage types, especially those occurring during DNA replication. These kinases are rapidly recruited and activated at DSBs through direct interactions with the Ku heterodimer (DNA-PKcs), the MRN complex (ATM), and ATRIP (ATR) ([Falck et al., 2005](#)). Once recruited, they have been proposed to participate in repair on three different levels ([Sirbu and Cortez, 2013](#)).

First of all, both ATM and DNA-PKcs play a direct role in repair at the break site in a manner that largely depends on their kinase activity. DNA-PKcs is a core component of the NHEJ machinery that allows both synapsis of DNA ends and the stable recruitment of the XRCC4/DNA Ligase 4 complex, required for end joining ([Calsou et al., 2003](#)). Consequently, its impairment leads to ends rejoining defects as measured by pulse field gel electrophoresis (PGFE) ([Beamish et al., 2000](#)). In contrast, ATM is dispensable for repair of most DSBs arising after irradiation, but required for efficient repair of DSBs induced in heterochromatin ([Beucher et al., 2009](#); [Goodarzi et al., 2008](#)) or with blocked DNA ends ([Álvarez-Quilón et al., 2014](#)).

Second, upon activation, PI3K-like kinases elicit checkpoint activation by phosphorylating a large number of substrates that either remain at the break site and thus play a direct role in signal amplification or diffuse from the break and mediate signal transduction that eventually leads to cell cycle arrest ([Sirbu and Cortez, 2013](#)).

Finally, these DSB-activated kinases trigger a profound remodeling of the chromatin structure at the vicinity of the break. One of their main substrates is the H2AX histone variant, incorporated in roughly one-tenth of nucleosomes (although its

distribution is slightly biased toward gene rich regions [Iacovoni et al., 2010; Seo et al., 2012]). Phosphorylation of H2AX on serine S139, referred to as  $\gamma$ -H2AX (Rogakou et al., 1998), is one of the earliest events that takes place at DSBs (for review, see Scully and Xie, 2013). Remarkably,  $\gamma$ -H2AX spreads on neighboring chromatin to form megabase-wide chromatin domains (Iacovoni et al., 2010; Savic et al., 2009), whose function is still unclear, although it has been suggested to act as a platform to recruit additional repair, signaling, and chromatin modifying enzymes. However, while H2AX null mice exhibit a range of phenotypes consistent with DSB coping defects (such as tumor susceptibility, sterility, and immunodeficiency; for review, see Scully and Xie [2013]), they are viable, indicating that DSB repair can occur without H2AX phosphorylation. At a molecular level,  $\gamma$ -H2AX serves as an anchor for MDC1, believed to mediate all  $\gamma$ -H2AX-dependent functions. Although not required for their initial recruitment, the  $\gamma$ -H2AX/MDC1 module is necessary for the accumulation and retention of DNA repair factors at DSBs (for review, see Scully and Xie, 2013), leading to the hypothesis that  $\gamma$ -H2AX could be involved in forming “repair foci” that concentrate repair factors and thus potentiate repair. Whether these repair foci contain one or more DSBs is still a matter of debate (Aten et al., 2004; Jakob et al., 2009b; Krawczyk et al., 2012; Soutoglou et al., 2007). Finally, several studies have pointed out a role for  $\gamma$ -H2AX in HR repair (Sonoda et al., 2007; Xie et al., 2004) and in homology search (Renkawitz et al., 2013).

Tremendous efforts have been made to identify both specific and/or overlapping functions of these DSB-activated PI3K-like kinases using genetics as well as specific chemical inhibition (e.g., see Callén et al., 2009; Riballo et al., 2004). However, their relative contributions are still unclear given that they share many common substrates, including  $\gamma$ -H2AX, and operate at different levels of the DDR, from break detection to signal transduction. These studies and their interpretation have been further complicated by the use of different DSB-induction methods, including high or low doses, global or localized radiation, genotoxic drugs (some of which lead to the generation of DSBs only during DNA replication), and controlled restriction enzymes inducing one (I-SceI; Zn-FokI) or multiple (I-PpoI, AsiSI) clean DSBs at different positions throughout the genome.

We recently reported the genome-wide distribution of  $\gamma$ -H2AX, XRCC4 (an NHEJ component), and RAD51 (involved in HR) around more than 100 DSBs throughout the human genome using the DlvA system (DSB inducible via AsiSI) expressing an inducible AsiSI restriction enzyme. These studies revealed that both repair and signaling depend on the localization of the DSB on the genome and the underlying chromatin context (Aymard et al., 2014; Iacovoni et al., 2010), with HR being promoted at transcriptionally active loci on the genome.

Here, we used the abovementioned DlvA system in order to clarify the function of ATM and DNA-PKcs in the repair and signaling of clean DSBs induced at different genomic locations and engaged in different repair pathways. Our study revealed that both ATM and DNA-PKcs are essential for survival and recruited at all DSBs, independently of their propensity to be repaired by HR or not. However, we clearly show that, once recruited, they exhibit non-redundant functions regarding

signaling and repair. At the repair level, DNA-PKcs is absolutely required for end joining at all investigated DSBs, while ATM is dispensable although promoting repair fidelity. By contrast, ATM is required for  $\gamma$ H2AX establishment at all breaks, while DNA-PKcs is dispensable for DSB-induced chromatin signaling. We also found that multiple AsiSI-induced DSBs are able to associate within repair foci, in a manner that strictly depends on ATM, but not DNA-PKcs, activity. Our study sheds light on the respective roles of ATM and DNA-PKcs regarding end joining,  $\gamma$ H2AX domain establishment, and repair foci formation.

## RESULTS

### ATM and DNA-PKcs Are Necessary for Cell Survival after AsiSI-Induced DSBs

In order to evaluate the sensitivity of human cells upon induction of a few hundred clean DSBs dispersed throughout the genome, we developed a clonogenic assay using AID-DlvA cells, an improved version of our DlvA model (Aymard et al., 2014). This cell line stably expresses a construct carrying AsiSI-ER fused to an auxin inducible degron (AID), which triggers the rapid degradation of the restriction enzyme upon auxin addition and thus enables repair of AsiSI-induced DSBs. As shown in Figure 1A, 4OHT treatment reduced clonogenic survival to about 20%, whereas auxin addition rescued cell survival to about 60%. Notably, both ATM and DNA-PKcs inhibition, using the highly potent and selective inhibitors KU55933 (ATMi) or Nu7441 (DNAPKi), respectively, led to a significant decrease in clonogenic survival (Figure 1A), whereas these two inhibitors only mildly affected survival in the absence of DSB induction (Figure S1A). Combining both inhibitors mimicked the effect observed with the DNA-PKcs inhibitor alone (Figure S1B). This indicates that both kinases are essential for cell survival after induction of AsiSI-induced DSBs.

### DNA-PKcs, but Not ATM, Is Required for AsiSI-Induced DSB Repair

We next thought to directly evaluate the function of these two kinases on the repair of various AsiSI-induced DSBs. Indeed, we found recently that distinct AsiSI-induced DSBs are not repaired equivalently, and we identified a subset of DSBs, localized in transcriptionally active, H3K36me3-rich chromatin, that are “HR-prone,” i.e., preferentially recruit RAD51, undergo resection, and rely on HR for efficient repair. On the other hand, AsiSI-induced DSBs localized either in intergenic regions or inactive genes could not recruit RAD51 and relied on XRCC4 for repair (Aymard et al., 2014).

In order to assay the respective roles of ATM and DNA-PKcs in repair at those HR- and non-HR-prone DSBs, we used a previously described cleavage assay that allows one to measure repair kinetics at selected AsiSI-induced DSBs (Aymard et al., 2014; Chailleux et al., 2014). Interestingly, while DNA-PKcs inhibition led to a severe repair defect, AsiSI-induced DSBs were efficiently religated upon ATM inhibition (Figure 1B). The combination of both inhibitors led to a repair deficiency similar to the one observed upon DNA-PKcs inhibition (Figure S1C). Notably, the effects of DNA-PKcs and ATM inhibition were identical on

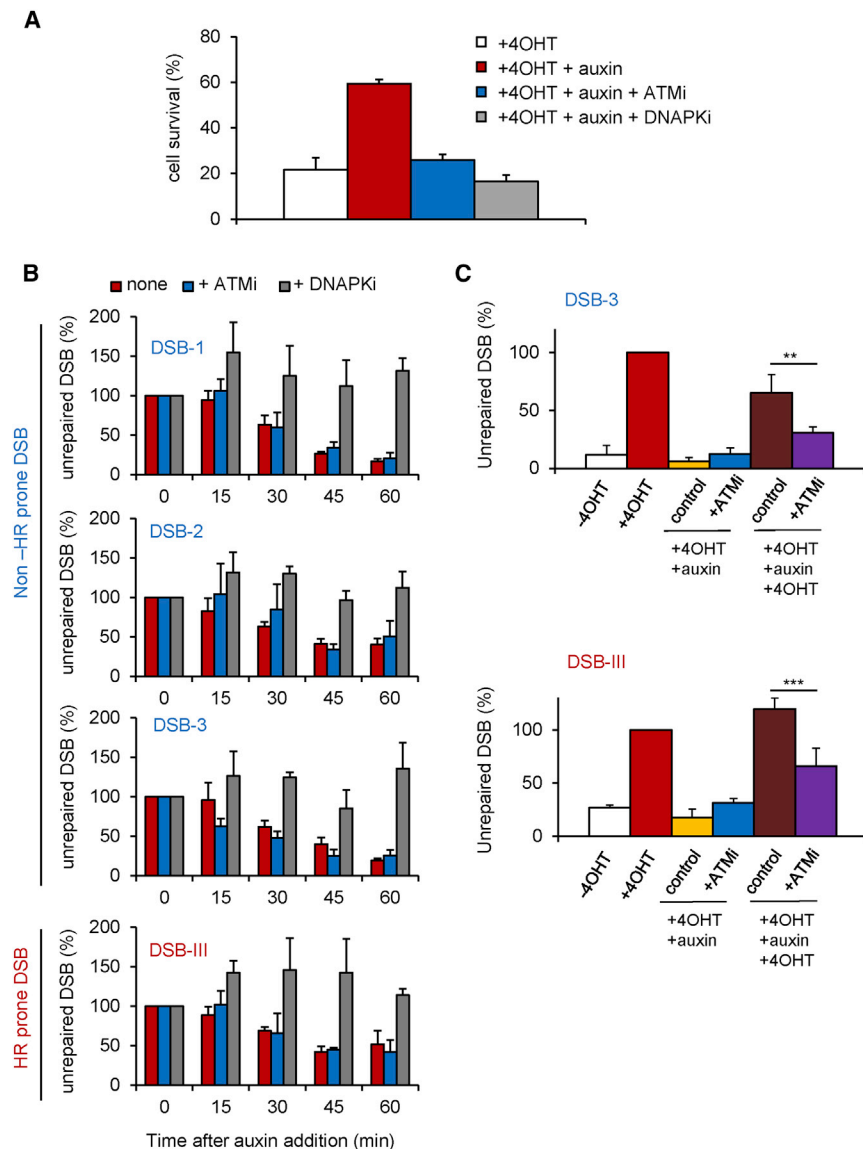

**Figure 1. Function of ATM and DNA-PKcs in Repair Kinetics and Repair Accuracy at AsiSI-Induced DSBs**

(A) Clonogenic assays in AID-DlvA cells after 4OHT treatment (4 hr), followed by auxin treatment (4 hr) in the presence of ATM inhibitor (KU55933), in the presence of DNA-PKcs inhibitor (Nu7441), or without inhibitor as indicated. Colonies were counted 10 days after 4OHT/auxin treatments. Average and SEM of biological replicates are shown (n = 3).

(B) Cleavage assay (Chailleux et al., 2014) in AID-DlvA cells treated with 4OHT (4 hr) followed by auxin (4 hr), in the absence or presence of ATM or DNA-PKcs inhibitors, as indicated. Immunoprecipitated DNA was analyzed close to four DSBs, either RAD51 unbound (indicated in blue, upper panels) or RAD51 bound (indicated in red, lower panel). The percentage of sites that remain broken for each DSB after the indicated time of auxin treatment are presented. Average and SEM (n = 3, technical replicates) of a representative experiment are shown (out of three independent experiments).

(C) Cleavage assay in AID-DlvA cells untreated (-4OHT) and treated with 4OHT (+4OHT) followed by auxin addition in the absence (+4OHT+auxin) or presence of the ATM inhibitor (+4OHT+auxin+ATMi) and an additional round of 4OHT treatment (+4OHT+auxin+4OHT and +4OHT+auxin+ATMi+4OHT). Immunoprecipitated DNA in each condition was analyzed by quantitative PCR at two AsiSI-induced DSBs (HR-prone DSB-III in red and non-HR-prone DSB3 in blue). Normalized pull-down efficiencies from a representative experiment are shown.

non-HR-prone or HR-prone DSBs (Figure 1B, compare the three top panels to the bottom panel). Altogether these data indicate that AsiSI-induced DSB repair depends on DNA-PKcs, but not on ATM activity, and that the function of these kinases is independent of the pathway used for repair and on the genomic location of the break.

Since ATM inhibition led to a severe survival defect (Figure 1A), we tested the accuracy of DSB repair in the presence of the ATM inhibitor. Faithful repair of an AsiSI-induced DSB leads to the reconstitution of the restriction site, thus available for a new round of enzymatic cleavage. We therefore measured the ability of AsiSI-ER to re-cleave sites once repair has occurred upon auxin addition either in the presence or absence of the ATM inhibitor. As described above, ATM inhibition during the repair step did not impede the re-joining of a non-HR prone (DSB-3; Figure 1C, top panel) or of an HR-prone DSB (DSB-III; Figure 1C, bottom panel) (compare yellow and blue bars). However, we

observed that an additional round of 4OHT treatment led to reduced AsiSI cleavage when DSB repair was performed in the presence of the ATM inhibitor compared to control (Figure 1C; compare brown and purple bars). Again, both HR and non-HR-prone DSBs behaved similarly. This indicates that ATM inhibition reduces repair accuracy at AsiSI-induced DSBs.

### Activated ATM and DNA-PKcs Are Recruited to the Vicinity of DSBs

To further investigate the functions of both kinases in DSB repair, we next analyzed their distribution around multiple DSBs induced on chromosome 1 and 6 by chromatin immunoprecipitation followed by hybridization on tiling arrays (ChIP-chip). To this end, 4OHT-treated or untreated DlvA cells were subjected to ChIP using antibodies directed against the activated forms of these kinases (phosphorylated ATM-Ser1981 and phosphorylated DNA-PKcs-S2056, two autophosphorylation events indicative of kinase activation) (Figures S2A–S2C). Inspection of ChIP-chip profiles indicated that both P-ATM and P-DNA-PKcs were detected in the vicinity of AsiSI-DSBs upon 4OHT treatment (see two examples, Figure 2A). Averaged P-ATM and

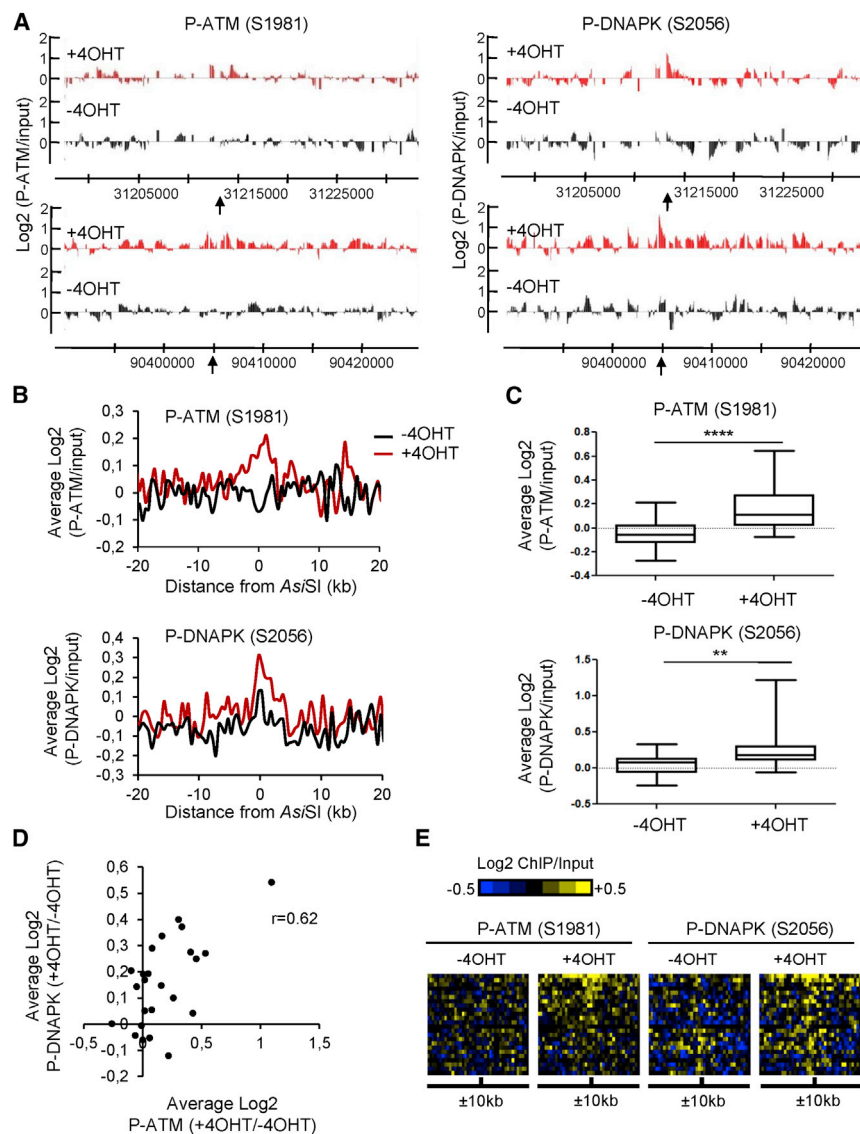

**Figure 2. Recruitment of P-ATM and P-DNA-PKCs at AsiSI-Induced DSBs**

(A) ChIP-chip analyses in DivA cells after 4OHT treatment (4 hr), using anti P-ATM S1981 (left panels) or anti-P-DNA-PKCs S2056 (right panels) antibodies. Profiles of both activated kinases before (in black) and after (in red) 4OHT treatment are shown at two AsiSI-induced DSBs (indicated by black arrows).

(B) Averaged signal for P-ATM S1981 (top) and P-DNA-PKCs S2056 (bottom) over 40-kb windows and centered at the AsiSI site are shown either before (black) or after (red) 4OHT treatment.

(C) Box plot representing the distribution of the averaged P-ATM S1981 (top) and P-DNA-PKCs S2056 (bottom) signals, calculated on 2-kb windows around each of the 24 AsiSI sites of chr1/6, with or without the indicated 4OHT treatment. \*\* $p < 0.01$ , \*\*\*\* $p < 0.001$  (paired Student's t test).

(D) Averaged P-ATM S1981 signal (x axis) calculated on 2-kb windows at each AsiSI site plotted against the averaged P-DNA-PKCs S2056 signal (y axis) calculated over the same window.  $r = 0.62$  (Pearson).

(E) Heatmap representation of P-ATM S1981 (left panels) and P-DNA-PKCs S2056 (right panels) signal across all AsiSI-induced DSBs on chromosomes 1 and 6 (sorted by P-ATM increasing signal over a 20-kb window).

P-DNA-PKCs profiles on all DSBs induced on chromosome 1 and 6 (24 sites; Iacovoni et al., 2010) showed a significant recruitment of both kinases within a  $\sim 5$ -kb window around DSBs (Figures 2B and 2C). However, while P-ATM and P-DNA-PKCs enrichment was restricted to the vicinity of the breaks for most of the DSBs, we could identify one DSB leading to a large spreading of both kinases on the surrounding chromatin (Figure S2D). Although the reasons for such a spreading are presently not clear, this indicated that the distribution of P-ATM and P-DNA-PKCs depends on the chromatin and/or the genomic context of the DSB. Of note, ATM was also dispensable for repair at this specific DSB (Figure S2E).

Importantly, both kinases showed a similar profile and were found to be similarly enriched at each AsiSI-induced DSB on chromosome 1 and 6. Accordingly, the average enrichment of P-ATM over a 2-kb window correlated with the averaged enrichment of P-DNA-PKCs calculated on the same window ( $r = 0.62$ ,

in sharp contrast to the megabase-wide spreading of  $\gamma$ -H2AX.

### $\gamma$ -H2AX Induction at AsiSI-DSBs Relies on ATM Activity

We next wondered how inhibition of these kinases would impact H2AX phosphorylation. Indeed, while the role of ATM in H2AX phosphorylation is well established, the function of DNA-PKCs toward this modification is still unclear since many studies have reported conflicting results, likely because of the various means used to induce DSBs. In addition, each kinase could be responsible for  $\gamma$ H2AX depending on the genomic localization of the break and/or the pathway used for repair. Finally, one could also envisage that both kinases are required at different locations around the DSB, to establish a proper  $\gamma$ H2AX domain. Thus, we used ATM and DNA-PKCs inhibitors to clarify the respective involvement of each kinase in H2AX phosphorylation around distinct DSBs located in various chromatin contexts.

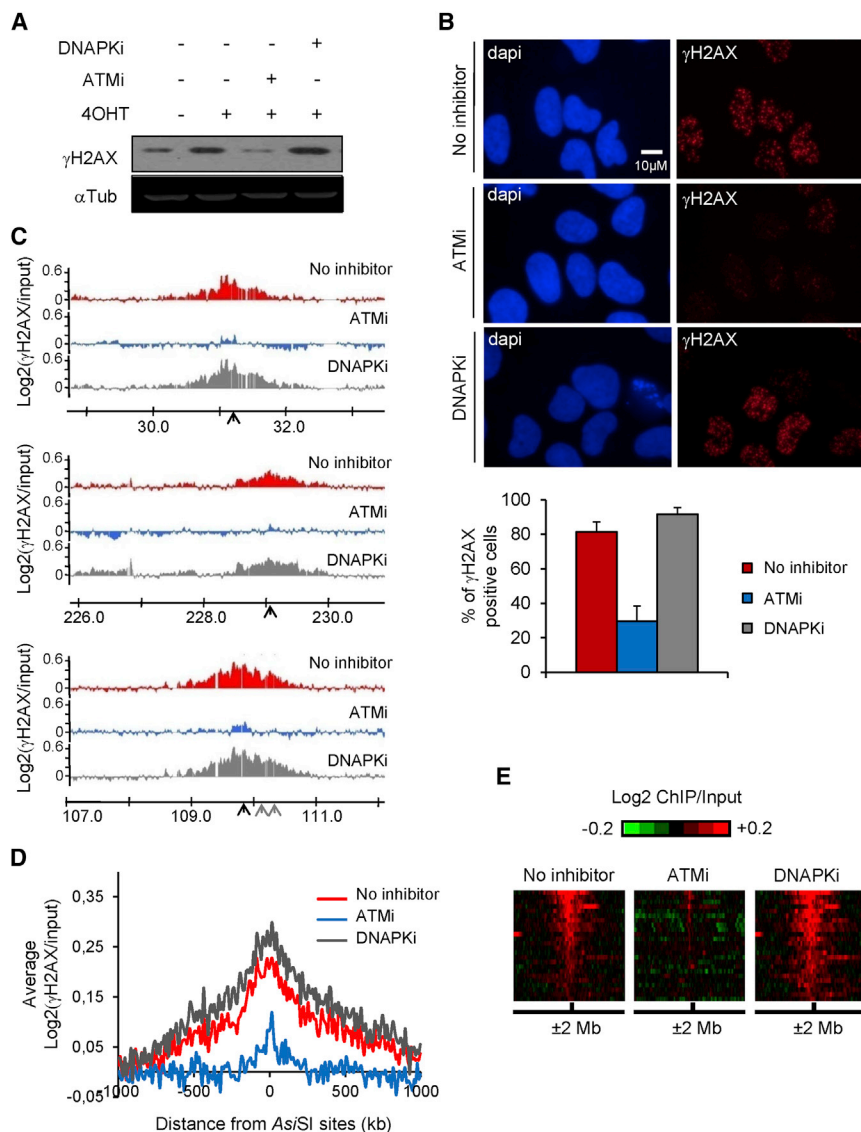

**Figure 3. ATM, but Not DNA-PKcs, Mediates H2AX Phosphorylation on Megabase-wide Domains around AsiSI-Induced DSBs**

(A) Western blot analyses of DlvA cells treated or not with 4OHT and ATM or DNA-PKcs inhibitors as indicated and stained for  $\gamma$ H2AX (top) and tubulin (loading control, bottom).

(B) The presence of  $\gamma$ H2AX foci was monitored by immunofluorescence in untreated or 4OHT-induced cells (4 hr), in the presence or not of ATM or DNA-PKcs inhibitors, as indicated. The bottom panel shows quantification from five biological replicates.

(C)  $\gamma$ H2AX ChIP-chip analyses in DlvA cells after 4OHT treatment (4 hr), in the presence or absence of ATM and DNA-PKcs inhibitors as indicated. Profiles of  $\gamma$ H2AX are shown at three AsiSI-induced DSBs (indicated by black arrows).

(D) The averaged  $\gamma$ H2AX signals in 4OHT-treated cells (in red) supplemented with ATM (blue) or DNA-PKcs inhibitors (gray) over a 2-Mb region flanking cleaved AsiSI sites are shown.

(E) Heatmap showing  $\gamma$ H2AX distribution over each AsiSI cleaved site for each condition (sorted by increasing  $\gamma$ H2AX level on a 500-kb window).

on chr1/6 in Figure 3D). Interestingly, we observed the same effects at all DSBs, regardless of the DSB location (Figure 3E). Altogether these data indicate that upon induction of multiple clean DSBs, ATM seems to be the main kinase responsible for H2AX phosphorylation over entire megabase domains and at all DSBs independently of their genomic location.

However, since a faint  $\gamma$ H2AX signal was still detected upon ATM inhibition (Figures 3A–3E), we wondered whether DNA-PKcs activity could account for this residual H2AX phosphorylation. A combined treatment with ATM and DNA-PKcs inhibitors did not lead to a further

decrease of  $\gamma$ H2AX as detected by western blot (Figure 4A) and immunostaining (Figure 4B). Surprisingly,  $\gamma$ H2AX ChIP-chip experiments in DlvA cells treated with both inhibitors even revealed an increased  $\gamma$ H2AX signal at the sites of DSB, compared to the signal in cells treated with ATM inhibitor alone (see Figure 4C for a few examples and Figure 4D for the averaged profiles). This indicates that DNA-PKcs does not contribute to the phosphorylation of H2AX and rather inhibits this event after induction of clean DSBs on the human genome. It also strongly suggests that another kinase is able to phosphorylate H2AX when both ATM and DNA-PKcs activities are impaired (and to a lesser extent when only ATM activity is impaired). We thus also performed additional experiments by combining ATM and DNA-PKcs inhibitors with inhibitors directed against other PI3K family members or kinases formerly found as able to phosphorylate H2AX or to regulate the DNA damage response although in different conditions (Lu et al., 2006; Shen et al., 2013; Ward

While western blot analysis revealed that ATM inhibition led to a major defect in global H2AX phosphorylation upon the induction of clean AsiSI-dependent DSBs, this was not the case with DNA-PKcs inhibition (Figure 3A). This result was confirmed by immunofluorescence analysis of 4OHT-treated DlvA cells. Indeed, while treatment with the ATM inhibitor led to a dramatic decrease in  $\gamma$ H2AX foci, inhibition of DNA-PKcs did not result in any detectable impairment of the  $\gamma$ H2AX signal (Figure 3B, see examples on the top panel and the quantification of four independent experiments on the bottom panel). We next performed  $\gamma$ H2AX ChIP-chip experiments to investigate at higher resolution the effect of PI3K-like kinase inhibitors on  $\gamma$ H2AX profiles around more than 20 DSBs induced on chromosomes 1 and 6. ATM inhibition led to a dramatic decrease in the  $\gamma$ H2AX signal around DSBs. In contrast, inhibition of DNA-PKcs did not alter the  $\gamma$ H2AX profile induced at the DSB (see three examples in Figure 3C and the average  $\gamma$ H2AX profile for the 24 DSBs induced

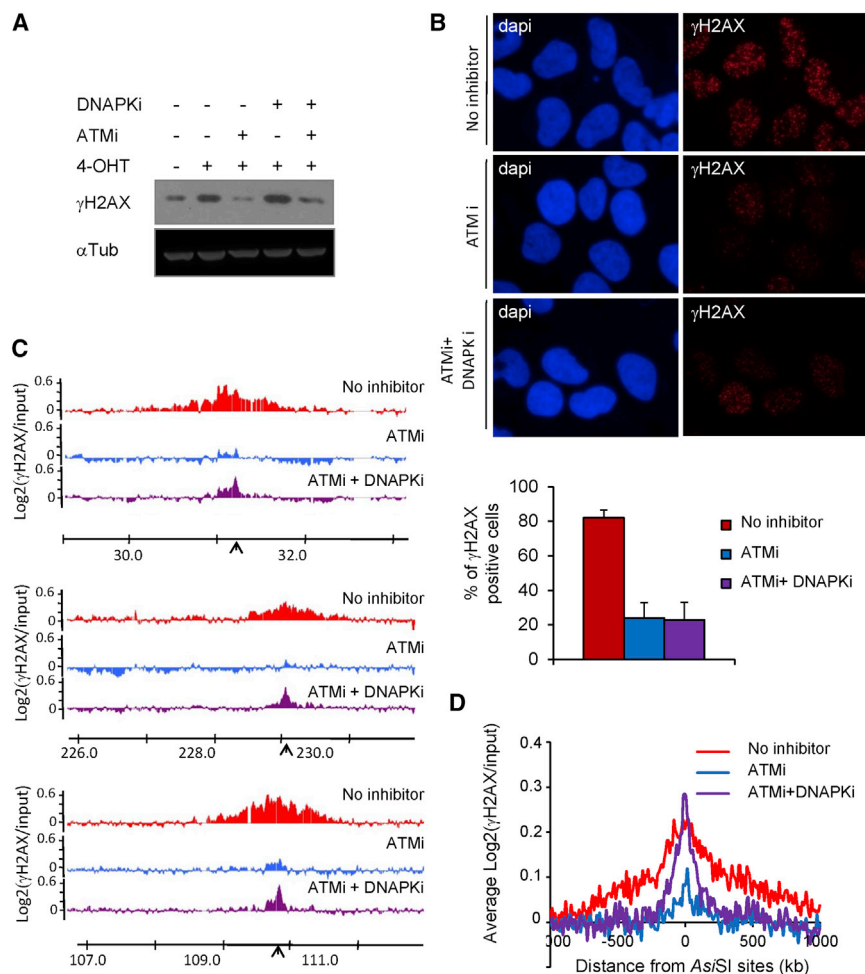

**Figure 4. Inhibition of Both DNA-PKcs and ATM Does Not Abrogate  $\gamma$ H2AX**

(A)  $\gamma$ H2AX (top) and tubulin (loading control, bottom) western blot analyses of DlvA cells treated with ATM and/or DNA-PKcs inhibitors as indicated.

(B) The presence of  $\gamma$ H2AX foci was monitored by immunofluorescence in 4OHT-induced cells (4 hr), in the presence of the ATM inhibitor alone or in combination with the DNA-PKcs inhibitor, as indicated. The bottom panel shows quantification from five biological replicates.

(C)  $\gamma$ H2AX ChIP-chip analyses in DlvA cells after 4OHT treatment (4 hr) and in the presence of the ATM inhibitor alone or in combination with DNA-PKcs inhibitor, as indicated. Profiles of  $\gamma$ H2AX are shown at three AsiSI-induced DSBs (indicated by black arrows).

(D) The averaged  $\gamma$ H2AX signals in 4OHT-treated cells (in red) supplemented with ATM (blue) or ATM+DNA-PKcs inhibitors (purple) over a 2-Mb region flanking cleaved AsiSI sites are shown.

and Chen, 2001). However, neither ATR inhibitor (Toledo et al., 2011) (Figures S3A–S3E), mTOR inhibitor (Figures S4A–S4C), nor JNK inhibitor (Figures S4D and S4E) decreased the residual  $\gamma$ H2AX signal observed upon ATMi and DNAPKi combination, indicating that a yet unidentified kinase is able to mediate H2AX phosphorylation to some extent, especially in conditions where ATM and DNA-PKcs activities are impaired.

### ATM, but Not DNA-PKcs, Is Required for Coalescence of AsiSI-Induced DSBs into Large Repair Foci

The fact that AsiSI induces a constant and known number of DSBs, which in addition are always located at the same genomic locations in all cells, prompted us to analyze  $\gamma$ H2AX foci structure and distribution by microscopy in order to also identify the function of both kinases in the global organization of damaged chromatin. Interestingly, in normal, 4OHT-treated cells,  $\gamma$ H2AX immunostaining revealed a number of foci largely reduced compared to the number of  $\gamma$ H2AX domains as depicted linearly on chromosomes by ChIP-seq (Aymard et al., 2014) (roughly 80 foci per cell compared to about 300 AsiSI-induced DSBs; Figure S5A), suggesting that these  $\gamma$ H2AX foci may contain more than one  $\gamma$ H2AX domain and thus more than a single DSB. Although still controversial, previous studies have demonstrated

that DSBs induced by  $\gamma$  or laser ( $\alpha$ -particles) irradiation are able to cluster (Aten et al., 2004; Krawczyk et al., 2012). In order to investigate whether AsiSI-induced DSBs may also exhibit clustering, we developed a DlvA cell line that expresses the 53BP1 repair protein fused to GFP, to follow DSB movement within the nuclear space by live cell imaging using a spinning disk confocal laser microscope. 53BP1-GFP was efficiently recruited at AsiSI-induced DSBs within the first hour of 4OHT treatment (Movies S1 and S2).

Strikingly, 53BP1-induced foci were highly dynamic and could undergo several cycles of association and dissociation within bigger foci (Figure S5C; Movies S3, S4, and S5), which confirms that multiple AsiSI-induced breaks are able to associate together within repair centers.

To get more insights into the structure of AsiSI-induced  $\gamma$ H2AX foci in normal conditions and upon kinase inhibition, we further used high-resolution microscopy. In 4OHT-treated cells,  $\gamma$ H2AX foci appeared to be composed of small substructures (Figure 5A, left panel), likely reflecting individual DSBs. To analyze the spatial distribution of these substructures, we performed a statistical test, using the Icy spatial analysis plug-in that describes the distribution of individual dots within the nucleus (Lagache et al., 2013). This plug-in, based on the Ripley's K function, statistically assesses the presence of clusters by comparing the values of the K function to its critical quantiles under spatial randomness. Clustering is statistically significant when the K function crosses the upper quantile. Notably, this test demonstrated that individual  $\gamma$ H2AX dots clustered in 4OHT-treated DlvA cells (Figure 5B, left panel). Interestingly, while DNA-PKcs inhibition did not alter the distribution of  $\gamma$ H2AX foci in response to 4OHT (Figure 5A, right panel), inhibition of ATM led to a dramatic dispersion of  $\gamma$ H2AX foci in the

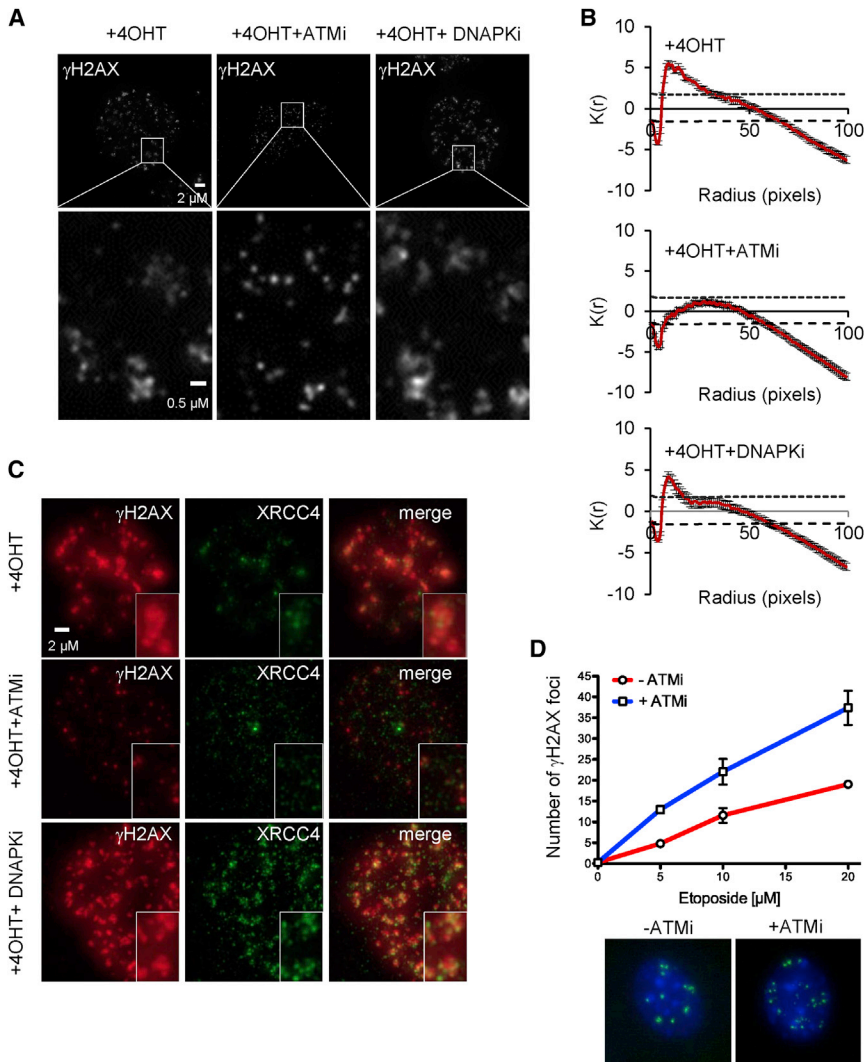

**Figure 5. Clustering of AsiSI-Induced DSBs Depends on ATM Activity**

(A)  $\gamma$ H2AX staining in 4OHT-treated DivA cells, in the presence of ATM or DNA-PKcs inhibitors, as indicated.

(B) Averaged Ripley function (y axis) depending on cluster size (x axis) illustrating the spatial distribution of  $\gamma$ H2AX spots identified in 4OHT-treated DivA cells in the presence of ATM or DNA-PKcs inhibitors, as indicated.

(C) Magnification of a 4OHT-treated cell, stained with  $\gamma$ H2AX (red) and XRCC4 (green) in the presence of ATM or DNA-PKcs inhibitors, as indicated. (D) Number of  $\gamma$ H2AX foci detected in cells treated (red) or not (blue) with ATM inhibitor, at increasing doses of etoposide. Average  $\pm$  SEM of the number of foci from at least three independent experiments is shown (top panel). Representative images of  $\gamma$ H2AX foci (green) and DAPI counterstain (blue) in cells treated with 10  $\mu$ M etoposide in the absence (-ATMi) or presence (+ATMi) of 10  $\mu$ M ATM inhibitor are shown on the bottom panel.

nucleus (Figure 5A, middle panel). Ripley K function describing the spatial distribution of  $\gamma$ H2AX dots in each condition indicated that ATM inhibitor treatment led to a random distribution of  $\gamma$ H2AX dots within the nucleus (Figure 5B, middle panel), while DNA-PKcs inhibition did not compromise foci clustering (Figure 5B, right panel). Altogether, these data favor a model in which AsiSI-induced DSBs are able to cluster within repair centers in an ATM-dependent, but DNA-PKcs-independent, manner.

To confirm that each individual substructure observed within a large  $\gamma$ H2AX focus represents a single DSB, we also performed immunostaining against XRCC4, a DSB repair protein that accumulates at the exact break point (on roughly 500 bp, according to our recent XRCC4 ChIP-seq mapping [Aymard et al., 2014]). To detect XRCC4 by immunofluorescence in damaged 4OHT-treated cells, we applied a recently described protocol (Britton et al., 2013) that permits detection of NHEJ repair proteins in ionizing radiation-induced nuclear foci (IRIF) (which was, until recently, impossible with standard staining procedures) (Fig-

ure S5B). In normal conditions, we could clearly identify  $\gamma$ H2AX foci containing two or more XRCC4 foci, showing that, indeed, several individual DSBs are found within a single repair focus (Figures 5C and S5D). This association of multiple XRCC4 foci within a  $\gamma$ H2AX focus was lost upon ATM inhibition, confirming that ATM is required for DSB clustering in human cells.

## DISCUSSION

In this study, by using the DivA cell line, which permits the induction of multiple annotated DSBs throughout the human genome, we showed that the major DDR PI3K-like kinases ATM and DNA-PKcs have complementary and non-overlapping functions in survival, repair, and  $\gamma$ H2AX establishment in the context of clean DSBs. We found that both kinases are recruited and activated to a similar extent at all investigated DSBs, in a manner that appears to be independent of the pathway used for subsequent repair. While DNA-PKcs activity is required for repair and survival, it is dispensable for  $\gamma$ H2AX domain establishment. By contrast, ATM is essential for cell survival and  $\gamma$ H2AX



phosphorylation but DSBs can be religated upon ATM inhibition, although in a less accurate manner.

Notably, these functions of DDR kinases at AsiSI-induced DSBs are independent of the pathway used to repair these breaks since both HR-prone and non-HR-prone DSBs behaved similarly. Finally, we found that multiple AsiSI-induced DSBs can associate within repair centers in an ATM-dependent manner. Altogether our study uncouples the induction of  $\gamma$ H2AX domains from the repair process itself and clarifies the function of both kinases in the DDR in response to clean DSBs generated at different locations on the genome.

### ATM Is Dispensable for DNA Ends Rejoining, but Is Required for Accurate Repair of Clean, Cohesive DSBs

Our data, in agreement with previous reports (Zhao et al., 2006), indicate that inhibition of DNA-PKcs activity severely impaired repair and cell survival upon induction of clean and easily repairable DSBs, though our assay would not discriminate whether repair is drastically delayed or totally inhibited. DNA-PKcs is a core component of the NHEJ machinery (Calsou et al., 2003; DeFazio et al., 2002), and its inhibition likely compromises XRCC4/DNA Ligase 4 dependent end joining. Furthermore, inhibition of DNA-PKcs activity interferes with DNA-PKcs autophosphorylation, an event required for its dissociation from DNA ends (Merkle et al., 2002). This lack of dissociation likely blocks both resection (Shibata et al., 2011; Zhou and Paull, 2013) and the potential ability to switch to an alternative pathway (either Alt-NHEJ or HR), thus leading to a severe repair defect (Chan et al., 2002; Cui et al., 2005). Interestingly, DNA-PKcs inhibition altered repair at both non-HR-prone DSBs as well as HR-prone DSBs, as identified in our previous study (Aymard et al., 2014). Together with our recent finding that XRCC4 is recruited at both HR-prone and non-HR-prone AsiSI-DSBs (Aymard et al., 2014), as is P-DNA-PKcs (this study), this favors the idea that the NHEJ machinery will first attempt to repair all DSBs (Shibata et al., 2011) and that blocking DNA-PKcs activity can inhibit the subsequent use of the HR machinery at HR-prone DSBs. In agreement with a role in DNA end joining, P-DNA-PKcs distribution was mostly restricted to the vicinity of DSBs (this study; Chandler et al., 2014), apart from few exceptions (Figure S2; Chandler et al., 2014) where it exhibited considerable spreading. Whether those specific DSBs undergo a specific repair pathway remains to be investigated.

While DNA-PKcs activity is essential for repair, our data indicate that ATM activity is dispensable for end rejoining at either HR or non-HR-prone DSBs, i.e., at DSBs induced in active or inactive genes. Since all AsiSI-induced DSBs occur in euchromatin, this is consistent with a recent study indicating that ATM activity is also not required for repair of etoposide-induced DSBs in TDP2 proficient cells (also mainly occurring within euchromatin), (Álvarez-Quilón et al., 2014). By contrast, repair of DSBs induced in heterochromatin is ATM dependent. At those DSBs, ATM would be required for chromatin remodeling permitting the loading and processing of repair machineries (Beucher et al., 2009; Goodarzi et al., 2008; Noon et al., 2010; Shibata et al., 2010). In addition, a recent report identified ATM as required for macroH2A1 loading and chromatin condensation, which are events shown to be necessary for BRCA1 retention

at DSB and HR repair (Khurana et al., 2014). Altogether these studies suggest that the main function of ATM might reside in its ability to modify the surrounding chromatin in order to facilitate repair, rather than in the repair reaction itself.

Interestingly, we found that, although effective, repair of clean DSBs is less accurate upon inhibition of ATM activity. This is in contrast with a recent finding that ATM inactivation did not alter the fidelity of unblocked DSBs end rejoining on plasmids in vivo (Álvarez-Quilón et al., 2014). Thus, ATM may be required to ensure fidelity of DSB repair in a chromosomal context only. Interestingly, ATM is also required to limit the use of distal ends to repair two chromosomal I-SceI tandem DSBs (Bennardo and Stark, 2010). This role of ATM in the promotion of faithful repair may be linked to the etiology of AT patients, who show abnormal rates of tumor apparition and progression, as well as severe neurodegenerative features.

### ATM Is Responsible for H2AX Phosphorylation around Clean DSBs

While the involvement of ATM in H2AX phosphorylation in response to DSBs is undebated, the function of DNA-PKcs toward  $\gamma$ H2AX remains controversial. Indeed, some studies suggested a predominant role for ATM in H2AX phosphorylation (Burma et al., 2001; Savic et al., 2009), while others reported that ATM and DNA-PKcs could largely substitute each other in that respect (e.g., Stiff et al., 2004; Wang et al., 2005). These apparent discrepancies likely arise from the variety of damages induced by X-rays or  $\gamma$  rays. Our study demonstrates that induction of clean DSBs throughout the human genome elicits  $\gamma$ H2AX formation in an ATM-dependent, but DNA-PKcs-independent, manner at all DSBs, independently of their genomic location and their propensity to be repaired by HR or not. Notably, as already reported (Burma et al., 2001; Savic et al., 2009), we observed residual  $\gamma$ H2AX levels upon ATM inhibition. However, in contrast with the observation made on the Ig $\kappa$  locus (Savic et al., 2009), this phosphorylation was DNA-PKcs independent, as indicated by global as well as high-resolution analyses of  $\gamma$ H2AX levels and distribution upon simultaneous inhibition of both kinases. This apparent contradiction likely arises from the fact that DSB repair and signaling strongly depend on the genomic context where the break occurs (Clouaire and Legube, 2015). This residual signal was also not lost upon ATR, JNK, or mTOR inhibition, indicating that yet unidentified kinase(s) contribute to H2AX phosphorylation after clean DSBs induction. Further high-resolution studies would help to identify such enzyme(s).

Importantly, ATM was the major kinase responsible for H2AX phosphorylation over the entire domain. The mechanism for  $\gamma$ H2AX spreading is still unknown, but it could result from (1) the spreading of the kinase itself in *cis*, (2) the local diffusion of the kinase within repair foci, or (3) dynamic chromatin fibers encountering ATM bound to DNA ends. Our ChIP-chip mapping of activated ATM revealed that, in contrast to  $\gamma$ H2AX, P-ATM is distributed on a restricted domain around most DSBs, excluding diffusion of the activated kinase in *cis* as a main mechanism for  $\gamma$ H2AX spreading. Interestingly, in yeast, the ATM counterpart Tel1 is able to phosphorylate H2A in *trans* (Lee et al., 2014). In addition, we previously reported that the distribution of  $\gamma$ H2AX

is strongly influenced by preexisting high-order chromatin structure (Caron et al., 2012). These data support a model in which ATM, bound to DNA ends, would be able to phosphorylate nucleosomal H2AX brought within proximity of a DSB through local motions of the surrounding chromatin. Interestingly, upon dual inhibition of both ATM and DNA-PKcs, the residual  $\gamma$ H2AX signal was observed on a more restricted area covering approximately 200 kb (Figure 4C), indicating that the ability to promote megabase-wide  $\gamma$ H2AX spreading is specific to ATM and is not shared by unidentified backup kinase(s) operating in this context.

### Function of ATM and DNA-PKcs in DSB Mobility and Cluster Formation

Whether DSBs are relocated in close proximity after their induction is still a matter of debate. In yeast, DSBs were reported to be highly mobile and to coalesce (Lisby et al., 2001). In mammals, conflicting results have been obtained regarding the mobility and potential clustering of radiation and nuclease-induced DSBs (Aten et al., 2004; Becker et al., 2014; Jakob et al., 2009a; Krawczyk et al., 2006, 2012; Kruhlak et al., 2006; Soutoglou et al., 2007). In addition, a recent study indicated that damaged telomeres in ALT cells undergo clustering in an HR-machinery-dependent manner (Cho et al., 2014).

The DivA system allows not only precise knowledge of the position of all AsiSI-induced DSBs but also their exact number within each cell. This permits comparison of the number of domains linearly depicted on the genome by ChIP-seq, with the number of  $\gamma$ H2AX foci detected by microscopy. We found that AsiSI-induced, clean DSBs are dynamic and can frequently coalesce within larger foci. However, DSB coalescence only occurred between spatially proximal 53BP1 foci. While a single enzymatically induced DSB has limited mobility (Soutoglou et al., 2007), it was shown that I-SceI-induced DSBs would frequently pair and that this motion of broken chromatin is a critical step in the biogenesis of translocation on the human genome (Roukos et al., 2013). Furthermore, such translocation events occurred mainly with linearly or spatially proximal chromatin (Roukos et al., 2013; Zhang et al., 2012). In summary, our data, as well as the recent literature, clearly support a model where multiple DSBs induced within spatial proximity of each other frequently associate within repair foci. Given that chromosome mobility depends on the chromatin context, it is highly likely that such observed DSB associations will vary from one genomic location to another and that all induced DSBs will not behave equivalently toward clustering. In addition, DSB mobility in yeast is highly dependent on the resection machinery (Dion et al., 2012; Miné-Hattab and Rothstein, 2012). It is thus tempting to speculate that HR-prone DSBs might be more prone to cluster than others. This would be in agreement with recent data showing that clustering of damaged telomeres also depends on the HR machinery (Cho et al., 2014).

Furthermore, in agreement with previous studies (Aten et al., 2004; Krawczyk et al., 2006, 2012) we showed that this event is driven by ATM, since ATM inhibition led to a complete dispersion of DSBs throughout the nucleus. In agreement, inhibi-

tion of Mre11 (a component of the MRN complex, whose retention at DSBs requires ATM activity) led to a clear decrease in DSB pairing (Roukos et al., 2013). Interestingly, other processes where distant DSBs are brought together, such as distal end rejoining, occurring during class switch and V(D)J recombination, or the fusion of deprotected telomeres, also depend on ATM (Difilippantonio et al., 2008; Dimitrova et al., 2008). Thus, DSB association is likely mediated by an ATM substrate. Of note, the 53BP1 repair protein, targeted by ATM, has been involved in both promoting telomere fusion and efficient V(D)J recombination (Difilippantonio et al., 2008; Dimitrova et al., 2008). Whether it also promotes AsiSI-induced DSB clustering remains to be investigated, even though a couple of studies indicated that depletion of 53BP1 did not impede DSB mobility (Krawczyk et al., 2012; Soutoglou et al., 2007). Furthermore, H2AX-deficient mice also display defects in both class switch and V(D)J recombination. Thus, a potential function of  $\gamma$ H2AX domains in ATM-dependent DSB pairing is an exciting possibility that should be further tested.

An open and critical question resides in why would clustering be beneficial for repair, taking into account the high risk of translocation generated by the proximity of distal DNA ends. Given that ATM is both involved in this process and in accurate repair, but not required for end joining itself, an interesting hypothesis would be that these events might help to increase the repair fidelity. In this regard, it is notable that neither ATM nor H2AX are required for survival in mammals (H2AX knockout mice are viable, as are AT patients) although their lack of function severely increase tumor susceptibility, in agreement with a potential reduction of repair accuracy. Whether ATM-dependent H2AX phosphorylation mediates DSB clustering and whether this event promotes repair fidelity are exciting hypotheses to be tested by future investigations.

## EXPERIMENTAL PROCEDURES

### Cell Culture

For AsiSI-dependent DSB induction, DivA or AID-DivA cells were treated with 300 nM 4OHT (Sigma; H7904) for 4 hr. When indicated, 4OHT-treated cells were incubated with 500  $\mu$ g/mL auxin. For the treatment with inhibitors, the following final concentrations were used: KU55933(ATMi), 20  $\mu$ M; Nu7441(DNAPKi), 2  $\mu$ M; ETP-46464 (ATRi, a kind gift from Dr. O. Fernandez-Capetillo), 5  $\mu$ M; rapamycin, 20 nM; and SP600125 (JNKi), 50  $\mu$ M. Inhibitors were added to the medium 1 hr before the addition of 4OHT and during the 4-hr stage of break induction (4OHT) and/or during the repair step (auxin) as indicated.

### ChIP

ChIP assays were carried out according to the protocol described in Iacovoni et al. (2010) and are detailed in the Supplemental Experimental Procedures. IP efficiencies were calculated as the percent of input DNA immunoprecipitated.

For ChIP-chip, 8 ng of inputs and samples were amplified as in Iacovoni et al. (2010), labeled, and hybridized on Affymetrix tiling arrays covering human chromosomes 1 and 6.

To plot data with respect to the 24 DSBs induced on chromosome 1 and 6 (Iacovoni et al., 2010), the ChIP-chip signal was averaged for 200-bp windows spanning 40 kb (P-ATM and P-DNA-PKcs) or 2 Mb ( $\gamma$ H2AX) surrounding each annotated AsiSI site. For heatmap representations, the average ChIP-chip signal was determined in 500-bp bins for P-ATM and P-DNA-PKcs, and 50-kb bins for  $\gamma$ H2AX, centered on each cleaved AsiSI site.

### Repair Kinetics and Repair Fidelity at AsiSI Sites

Repair kinetics at specific AsiSI-induced DSBs were measured as described in [Aymard et al. \(2014\)](#) by a cleavage assay permitting the capture of unrepaired DSBs, at the indicated times after auxin addition. For fidelity assays, DlvA cells were treated with 4OHT to induce DSBs for 4 hr (300 nM) followed by an auxin treatment for 4 hr, in the presence or absence of ATMi (KU55933). The next day, cells were treated again with 4OHT for 4 hr. DNA was extracted and subjected to a cleavage assay as described above.

### Immunofluorescence

Detailed methods for immunofluorescence against  $\gamma$ H2AX (JBW301) in DlvA cells have already been described in [Iacovoni et al. \(2010\)](#). XRCC4 staining was performed according to the protocol described in [Britton et al. \(2013\)](#). For high-resolution microscopy, a fluorescent widefield microscope was used to produce 3D image of the nucleus and subjected to deconvolution ([Supplemental Experimental Procedures](#)). Spot distribution was analyzed using the spatial analysis plug-in available in Icy. Live cell analysis was performed using an Andor Revolution Nipkow-disk confocal system. For the illustrations shown in [Figure S5C](#), maximum projections using Image J were performed to generate 2D movies.

### ACCESSION NUMBERS

The accession number for the ChIP-chip data reported in this paper is Array Express: E-MTAB-2992. 4D movies for time-lapse microscopy are available upon request.

### SUPPLEMENTAL INFORMATION

Supplemental Information includes Supplemental Experimental Procedures, five figures, and five movies and can be found with this article online at <http://dx.doi.org/10.1016/j.celrep.2015.10.024>.

### AUTHOR CONTRIBUTIONS

J.C., P.C., B.B., and V.D. performed experiments. J.S.I., T.C., and M.A. performed bioinformatics analyses of the ChIP-chip data. T.M. performed high-resolution microscopy and  $\gamma$ H2AX foci spatial distribution. A.A.-Q. and F.C.-L. performed induction of  $\gamma$ H2AX foci in response to etoposide. G.L. conceived and analyzed experiments and wrote the manuscript. All authors commented and edited the manuscript.

### ACKNOWLEDGMENTS

We thank V. Benes at the EMBL Genomic Core Facility for microarrays hybridization. We thank Dr. C. Normand for time-lapse microscopy. We thank Dr. D. Jullien for the pEGFP-53BP1 and Dr. O. Fernandez Capetillo for the ATR inhibitor. T.C. and M.A. were supported by grants from the Fondation pour la Recherche Médicale (FRM). P.C. was supported by a grant from the Association Contre le Cancer (ARC). J.C. is supported by a grant from the Ligue Nationale contre le Cancer. Work in the F.C.-L. laboratory is funded by grants and fellowships from the Spanish Government (SAF2010-21017 and BES-2011-047351) and the regional Andalusian Government (CVI-7948). Funding in the G.L. laboratory was provided by grants from the Agence Nationale pour la Recherche (ANR-14-CE10-0002-01 and ANR-13-BSV8-0013), the Institut National contre le Cancer (INCA), the Ligue Nationale contre le Cancer (LNCC), and Research Innovation Therapeutic Cancerologie (RITC). This project has received funding from the European Research Council (ERC) under the European Union's Horizon 2020 research and innovation programme (grant agreement 647344).

Received: February 4, 2015

Revised: September 4, 2015

Accepted: October 6, 2015

Published: November 12, 2015

### REFERENCES

- Álvarez-Quilón, A., Serrano-Benítez, A., Lieberman, J.A., Quintero, C., Sánchez-Gutiérrez, D., Escudero, L.M., and Cortés-Ledesma, F. (2014). ATM specifically mediates repair of double-strand breaks with blocked DNA ends. *Nat. Commun.* **5**, 3347.
- Aten, J.A., Stap, J., Krawczyk, P.M., van Oven, C.H., Hoebe, R.A., Essers, J., and Kanaar, R. (2004). Dynamics of DNA double-strand breaks revealed by clustering of damaged chromosome domains. *Science* **303**, 92–95.
- Aymard, F., Bugler, B., Schmidt, C.K., Guillou, E., Caron, P., Briois, S., Iacovoni, J.S., Daburon, V., Miller, K.M., Jackson, S.P., and Legube, G. (2014). Transcriptionally active chromatin recruits homologous recombination at DNA double-strand breaks. *Nat. Struct. Mol. Biol.* **21**, 366–374.
- Beamish, H.J., Jessberger, R., Riballo, E., Priestley, A., Blunt, T., Kysela, B., and Jeggo, P.A. (2000). The C-terminal conserved domain of DNA-PKcs, missing in the SCID mouse, is required for kinase activity. *Nucleic Acids Res.* **28**, 1506–1513.
- Becker, A., Durante, M., Taucher-Scholz, G., and Jakob, B. (2014). ATM alters the otherwise robust chromatin mobility at sites of DNA double-strand breaks (DSBs) in human cells. *PLoS ONE* **9**, e92640.
- Bennardo, N., and Stark, J.M. (2010). ATM limits incorrect end utilization during non-homologous end joining of multiple chromosome breaks. *PLoS Genet.* **6**, e1001194.
- Beucher, A., Birraux, J., Tchouandong, L., Barton, O., Shibata, A., Conrad, S., Goodarzi, A.A., Krempler, A., Jeggo, P.A., and Löbrich, M. (2009). ATM and Artemis promote homologous recombination of radiation-induced DNA double-strand breaks in G2. *EMBO J.* **28**, 3413–3427.
- Britton, S., Coates, J., and Jackson, S.P. (2013). A new method for high-resolution imaging of Ku foci to decipher mechanisms of DNA double-strand break repair. *J. Cell Biol.* **202**, 579–595.
- Burma, S., Chen, B.P., Murphy, M., Kurimasa, A., and Chen, D.J. (2001). ATM phosphorylates histone H2AX in response to DNA double-strand breaks. *J. Biol. Chem.* **276**, 42462–42467.
- Callén, E., Jankovic, M., Wong, N., Zha, S., Chen, H.T., Difilippantonio, S., Di Virgilio, M., Heidkamp, G., Alt, F.W., Nussenzweig, A., and Nussenzweig, M. (2009). Essential role for DNA-PKcs in DNA double-strand break repair and apoptosis in ATM-deficient lymphocytes. *Mol. Cell* **34**, 285–297.
- Calsou, P., Delteil, C., Frit, P., Drouet, J., and Salles, B. (2003). Coordinated assembly of Ku and p460 subunits of the DNA-dependent protein kinase on DNA ends is necessary for XRCC4-ligase IV recruitment. *J. Mol. Biol.* **326**, 93–103.
- Caron, P., Aymard, F., Iacovoni, J.S., Briois, S., Canitrot, Y., Bugler, B., Maspip, L., Losada, A., and Legube, G. (2012). Cohesin protects genes against  $\gamma$ H2AX induced by DNA double-strand breaks. *PLoS Genet.* **8**, e1002460.
- Chailleux, C., Aymard, F., Caron, P., Daburon, V., Courilleau, C., Canitrot, Y., Legube, G., and Trouche, D. (2014). Quantifying DNA double-strand breaks induced by site-specific endonucleases in living cells by ligation-mediated purification. *Nat. Protoc.* **9**, 517–528.
- Chan, D.W., Chen, B.P., Prithivirajasingh, S., Kurimasa, A., Story, M.D., Qin, J., and Chen, D.J. (2002). Autophosphorylation of the DNA-dependent protein kinase catalytic subunit is required for rejoining of DNA double-strand breaks. *Genes Dev.* **16**, 2333–2338.
- Chandler, H., Patel, H., Palermo, R., Brookes, S., Matthews, N., and Peters, G. (2014). Role of polycomb group proteins in the DNA damage response—a reassessment. *PLoS ONE* **9**, e102968.
- Cho, N.W., Dilley, R.L., Lampson, M.A., and Greenberg, R.A. (2014). Interchromosomal homology searches drive directional ALT telomere movement and synapsis. *Cell* **159**, 108–121.
- Clouaire, T., and Legube, G. (2015). DNA double strand break repair pathway choice: a chromatin based decision? *Nucleus* **6**, 107–113.
- Cui, X., Yu, Y., Gupta, S., Cho, Y.M., Lees-Miller, S.P., and Meek, K. (2005). Autophosphorylation of DNA-dependent protein kinase regulates DNA end

- processing and may also alter double-strand break repair pathway choice. *Mol. Cell Biol.* 25, 10842–10852.
- DeFazio, L.G., Stansel, R.M., Griffith, J.D., and Chu, G. (2002). Synapsis of DNA ends by DNA-dependent protein kinase. *EMBO J.* 21, 3192–3200.
- Deriano, L., and Roth, D.B. (2013). Modernizing the nonhomologous end-joining repertoire: alternative and classical NHEJ share the stage. *Annu. Rev. Genet.* 47, 433–455.
- Difilippantonio, S., Gapud, E., Wong, N., Huang, C.Y., Mahowald, G., Chen, H.T., Kruhlak, M.J., Callen, E., Livak, F., Nussenzweig, M.C., et al. (2008). 53BP1 facilitates long-range DNA end-joining during V(D)J recombination. *Nature* 456, 529–533.
- Dimitrova, N., Chen, Y.C., Spector, D.L., and de Lange, T. (2008). 53BP1 promotes non-homologous end joining of telomeres by increasing chromatin mobility. *Nature* 456, 524–528.
- Dion, V., Kalck, V., Horigome, C., Towbin, B.D., and Gasser, S.M. (2012). Increased mobility of double-strand breaks requires Mec1, Rad9 and the homologous recombination machinery. *Nat. Cell Biol.* 14, 502–509.
- Falck, J., Coates, J., and Jackson, S.P. (2005). Conserved modes of recruitment of ATM, ATR and DNA-PKcs to sites of DNA damage. *Nature* 434, 605–611.
- Goodarzi, A.A., Noon, A.T., Deckbar, D., Ziv, Y., Shiloh, Y., Löbrich, M., and Jeggo, P.A. (2008). ATM signaling facilitates repair of DNA double-strand breaks associated with heterochromatin. *Mol. Cell* 31, 167–177.
- Iacovoni, J.S., Caron, P., Lassadi, I., Nicolas, E., Massip, L., Trouche, D., and Legube, G. (2010). High-resolution profiling of gammaH2AX around DNA double strand breaks in the mammalian genome. *EMBO J.* 29, 1446–1457.
- Jakob, B., Splinter, J., Durante, M., and Taucher-Scholz, G. (2009a). Live cell microscopy analysis of radiation-induced DNA double-strand break motion. *Proc. Natl. Acad. Sci. USA* 106, 3172–3177.
- Jakob, B., Splinter, J., and Taucher-Scholz, G. (2009b). Positional stability of damaged chromatin domains along radiation tracks in mammalian cells. *Radiat. Res.* 171, 405–418.
- Jasin, M., and Rothstein, R. (2013). Repair of strand breaks by homologous recombination. *Cold Spring Harb. Perspect. Biol.* 5, a012740.
- Khurana, S., Kruhlak, M.J., Kim, J., Tran, A.D., Liu, J., Nyswaner, K., Shi, L., Jailwala, P., Sung, M.H., Hakim, O., and Oberdoerffer, P. (2014). A macrohistone variant links dynamic chromatin compaction to BRCA1-dependent genome maintenance. *Cell Rep.* 8, 1049–1062.
- Krawczyk, P.M., Stap, J., van Oven, C., Hoebe, R., and Aten, J.A. (2006). Clustering of double strand break-containing chromosome domains is not inhibited by inactivation of major repair proteins. *Radiat. Prot. Dosimetry* 122, 150–153.
- Krawczyk, P.M., Borovski, T., Stap, J., Cijssouw, T., ten Cate, R., Medema, J.P., Kanaar, R., Franken, N.A., and Aten, J.A. (2012). Chromatin mobility is increased at sites of DNA double-strand breaks. *J. Cell Sci.* 125, 2127–2133.
- Kruhlak, M.J., Celeste, A., Deliaire, G., Fernandez-Capetillo, O., Müller, W.G., McNally, J.G., Bazett-Jones, D.P., and Nussenzweig, A. (2006). Changes in chromatin structure and mobility in living cells at sites of DNA double-strand breaks. *J. Cell Biol.* 172, 823–834.
- Lagache, T., Lang, G., Sauvonnnet, N., and Olivo-Marin, J.C. (2013). Analysis of the spatial organization of molecules with robust statistics. *PLoS ONE* 8, e80914.
- Lee, C.S., Lee, K., Legube, G., and Haber, J.E. (2014). Dynamics of yeast histone H2A and H2B phosphorylation in response to a double-strand break. *Nat. Struct. Mol. Biol.* 21, 103–109.
- Lisby, M., Rothstein, R., and Mortensen, U.H. (2001). Rad52 forms DNA repair and recombination centers during S phase. *Proc. Natl. Acad. Sci. USA* 98, 8276–8282.
- Lu, C., Zhu, F., Cho, Y.Y., Tang, F., Zykova, T., Ma, W.Y., Bode, A.M., and Dong, Z. (2006). Cell apoptosis: requirement of H2AX in DNA ladder formation, but not for the activation of caspase-3. *Mol. Cell* 23, 121–132.
- Merkle, D., Douglas, P., Moorhead, G.B., Leonenko, Z., Yu, Y., Cramb, D., Bazett-Jones, D.P., and Lees-Miller, S.P. (2002). The DNA-dependent protein kinase interacts with DNA to form a protein-DNA complex that is disrupted by phosphorylation. *Biochemistry* 41, 12706–12714.
- Miné-Hattab, J., and Rothstein, R. (2012). Increased chromosome mobility facilitates homology search during recombination. *Nat. Cell Biol.* 14, 510–517.
- Noon, A.T., Shibata, A., Rief, N., Löbrich, M., Stewart, G.S., Jeggo, P.A., and Goodarzi, A.A. (2010). 53BP1-dependent robust localized KAP-1 phosphorylation is essential for heterochromatic DNA double-strand break repair. *Nat. Cell Biol.* 12, 177–184.
- Renkawitz, J., Lademann, C.A., and Jentsch, S. (2013).  $\gamma$ H2AX spreading linked to homology search. *Cell Cycle* 12, 2526–2527.
- Riballo, E., Kühne, M., Rief, N., Doherty, A., Smith, G.C., Recio, M.J., Reis, C., Dahm, K., Fricke, A., Krempler, A., et al. (2004). A pathway of double-strand break rejoining dependent upon ATM, Artemis, and proteins locating to gamma-H2AX foci. *Mol. Cell* 16, 715–724.
- Rogakou, E.P., Pilch, D.R., Orr, A.H., Ivanova, V.S., and Bonner, W.M. (1998). DNA double-stranded breaks induce histone H2AX phosphorylation on serine 139. *J. Biol. Chem.* 273, 5858–5868.
- Roukos, V., Voss, T.C., Schmidt, C.K., Lee, S., Wangsa, D., and Misteli, T. (2013). Spatial dynamics of chromosome translocations in living cells. *Science* 341, 660–664.
- Savic, V., Yin, B., Maas, N.L., Bredemeyer, A.L., Carpenter, A.C., Helmink, B.A., Yang-lott, K.S., Sleckman, B.P., and Bassing, C.H. (2009). Formation of dynamic gamma-H2AX domains along broken DNA strands is distinctly regulated by ATM and MDC1 and dependent upon H2AX densities in chromatin. *Mol. Cell* 34, 298–310.
- Scully, R., and Xie, A. (2013). Double strand break repair functions of histone H2AX. *Mutat. Res.* 750, 5–14.
- Seo, J., Kim, S.C., Lee, H.S., Kim, J.K., Shon, H.J., Salleh, N.L., Desai, K.V., Lee, J.H., Kang, E.S., Kim, J.S., and Choi, J.K. (2012). Genome-wide profiles of H2AX and  $\gamma$ -H2AX differentiate endogenous and exogenous DNA damage hotspots in human cells. *Nucleic Acids Res.* 40, 5965–5974.
- Shen, C., Oswald, D., Phelps, D., Cam, H., Pelloski, C.E., Pang, Q., and Houghton, P.J. (2013). Regulation of FANCD2 by the mTOR pathway contributes to the resistance of cancer cells to DNA double-strand breaks. *Cancer Res.* 73, 3393–3401.
- Shibata, A., Barton, O., Noon, A.T., Dahm, K., Deckbar, D., Goodarzi, A.A., Löbrich, M., and Jeggo, P.A. (2010). Role of ATM and the damage response mediator proteins 53BP1 and MDC1 in the maintenance of G(2)/M checkpoint arrest. *Mol. Cell Biol.* 30, 3371–3383.
- Shibata, A., Conrad, S., Birraux, J., Geuting, V., Barton, O., Ismail, A., Kakarougkas, A., Meek, K., Taucher-Scholz, G., Löbrich, M., and Jeggo, P.A. (2011). Factors determining DNA double-strand break repair pathway choice in G2 phase. *EMBO J.* 30, 1079–1092.
- Sirbu, B.M., and Cortez, D. (2013). DNA damage response: three levels of DNA repair regulation. *Cold Spring Harb. Perspect. Biol.* 5, a012724.
- Sonoda, E., Zhao, G.Y., Kohzaki, M., Dhar, P.K., Kikuchi, K., Redon, C., Pilch, D.R., Bonner, W.M., Nakano, A., Watanabe, M., et al. (2007). Collaborative roles of gammaH2AX and the Rad51 paralog Xrcc3 in homologous recombinational repair. *DNA Repair (Amst.)* 6, 280–292.
- Soutoglou, E., Dorn, J.F., Sengupta, K., Jasin, M., Nussenzweig, A., Ried, T., Danuser, G., and Misteli, T. (2007). Positional stability of single double-strand breaks in mammalian cells. *Nat. Cell Biol.* 9, 675–682.
- Stiff, T., O'Driscoll, M., Rief, N., Iwabuchi, K., Löbrich, M., and Jeggo, P.A. (2004). ATM and DNA-PK function redundantly to phosphorylate H2AX after exposure to ionizing radiation. *Cancer Res.* 64, 2390–2396.
- Toledo, L.I., Murga, M., Zur, R., Soria, R., Rodriguez, A., Martinez, S., Oyarzabal, J., Pastor, J., Bischoff, J.R., and Fernandez-Capetillo, O. (2011). A cell-based screen identifies ATR inhibitors with synthetic lethal properties for cancer-associated mutations. *Nat. Struct. Mol. Biol.* 18, 721–727.
- Wang, H., Wang, M., Wang, H., Böcker, W., and Iliakis, G. (2005). Complex H2AX phosphorylation patterns by multiple kinases including ATM and DNA-PK in human cells exposed to ionizing radiation and treated with kinase inhibitors. *J. Cell. Physiol.* 202, 492–502.

- Ward, I.M., and Chen, J. (2001). Histone H2AX is phosphorylated in an ATR-dependent manner in response to replicational stress. *J. Biol. Chem.* 276, 47759–47762.
- Xie, A., Puget, N., Shim, I., Odate, S., Jarzyna, I., Bassing, C.H., Alt, F.W., and Scully, R. (2004). Control of sister chromatid recombination by histone H2AX. *Mol. Cell* 16, 1017–1025.
- Zhang, Y., McCord, R.P., Ho, Y.J., Lajoie, B.R., Hildebrand, D.G., Simon, A.C., Becker, M.S., Alt, F.W., and Dekker, J. (2012). Spatial organization of the mouse genome and its role in recurrent chromosomal translocations. *Cell* 148, 908–921.
- Zhao, Y., Thomas, H.D., Batey, M.A., Cowell, I.G., Richardson, C.J., Griffin, R.J., Calvert, A.H., Newell, D.R., Smith, G.C., and Curtin, N.J. (2006). Preclinical evaluation of a potent novel DNA-dependent protein kinase inhibitor NU7441. *Cancer Res.* 66, 5354–5362.
- Zhou, Y., and Paull, T.T. (2013). DNA-dependent protein kinase regulates DNA end resection in concert with Mre11-Rad50-Nbs1 (MRN) and ataxia telangiectasia-mutated (ATM). *J. Biol. Chem.* 288, 37112–37125.

## **Supplemental Information**

### **Non redundant functions of ATM and DNAPK in response to DNA Double-Strand Breaks.**

Caron P.<sup>1,2,#</sup>, Choudjaye J.<sup>1,2,#</sup>, Clouaire T.<sup>1,2</sup>, Bugler B.<sup>1,2</sup>, Daburon V.<sup>1,2</sup>., Aguirrebengoa M.<sup>1,2</sup>, Mangeat T.<sup>1,2</sup>, Iacovoni J.S<sup>3</sup> , Álvarez-Quilón A.<sup>4</sup>, Cortes-Ledesma F.<sup>4</sup>., and Legube G.<sup>1,2,\*</sup>

Supplemental Material and Methods

Legend for Supplemental Movies 1-5

Supplemental Figures 1-5

## **Experimental Procedures**

### **AID-DIV<sub>A</sub> 53BP1GFP stable cell line**

The pEGFP-53BP1 plasmid (kindly provided by Dr D. Jullien, ITAV, Toulouse) was transfected into AID-DIV<sub>A</sub> cells by using the Cell Line Nucleofactor kit V (Amaxa) and selection was performed with 1 µg/mL puromycin. Monoclonal, stable cell lines were selected based on 53BP1-GFP expression level and 4OHT response.

### **Cell culture**

DIV<sub>A</sub> (AsiSI-ER-U20S), AID-DIV<sub>A</sub> (AID-AsiSI-ER-U20S) and AID-DIV<sub>A</sub> 53BP1-GFP cells were cultured in Dulbecco's modified Eagle's medium (DMEM) supplemented with antibiotics, 10% FCS (Invitrogen) and either 1 µg/mL puromycin (DIV<sub>A</sub> and AID-DIV<sub>A</sub> 53BP1-GFP cells) or 800 µg/mL G418 (AID-DIV<sub>A</sub> cells; AID-DIV<sub>A</sub> 53BP1-GFP) at 37°C under a humidified atmosphere with 5% CO<sub>2</sub>. Primary MEFs were isolated from embryos at day 13 p.c. and cultured at 37°C, 5% CO<sub>2</sub>, 3% O<sub>2</sub> in Dulbecco's Modified Eagle's Medium (DMEM) supplemented with glutamine, penicillin, streptomycin, 15% FCS and non-essential aminoacids. Experiments were carried out between P1 and P5.

For AsiSI-dependent DSB induction, cells were treated with 300 nM 4OHT (Sigma; H7904) for 4h. When indicated, 4OHT treated cells were washed 3 times in pre-warmed PBS and further incubated with 500 µg/mL auxin (Sigma; I5148). KU55933 and Nu7441 (Tocris Bioscience) were respectively used at the final concentrations of 20 µM and 2 µM. ETP-46464 (ATRi) was a kind gift from Dr O. Fernandez Capetillo, and used at a final concentration of 5 µM. Rapamycin (mTORi) and SP600125 (JNKi) were respectively used at 20 nM and 50 µM. Inhibitors were added to the medium one hour before the addition of 4OHT and during the 4h stage of break induction (4OHT) and/or during the repair step (auxin) as indicated.

ATM and DNAPK siRNAs transfection was performed using the Amaxa® Cell Line Nucleofactor® Kit V, and program X001 for 48h hours followed by a 4h 4OHT treatment. The following siRNA were used: DNAPK: GGG-CGC-UAA-UCG-UAC-UGA-tt, ATM: GCC-UCC-AGG-CAG-AAA-AAG-Att

### **Clonogenic assays**

AID-DIV<sub>A</sub> cells were seeded at a clonal density in 10 cm diameter dishes. The next day, cells were treated with 300 nM 4OHT for 4 hours and, when indicated, washed 3 times in pre-

warmed PBS and further incubated with 500 µg/mL auxin in presence of the inhibitors or not, for another 4 hours. After 3 washes in pre-warmed PBS, complete medium was added to each dish. After 7 to 10 days, cells were stained with crystal violet (Sigma) and counted. Only colonies containing more than 50 cells were scored.

### **Western Blot**

Western blot analysis was performed using NuPAGE Tris-acetate 3-8% gels and reagents (Invitrogen) according to the manufacturer's indications. Briefly, cells were rinsed twice with ice-cold PBS and then lysed in the appropriate lysis buffer with sample reducing agent (Invitrogen). Liquid transfer of resolved proteins was performed onto PVDF membranes (Invitrogen). After 1 h block in 5% non-fat dry milk / 0.5% PBS-Tween, membranes were incubated overnight with anti-γH2AX antibody (Cell Signaling, 2577s, 1/500) and anti-α-tubulin (Sigma, DM1A, 1/50000). Validations for these antibodies are available on the manufacturers' websites. Horseradish peroxidase-coupled secondary antibodies were from Amersham Biosciences, and the chemiluminescence Lumilight reagent was from Roche Diagnostic.

### **Chromatin immunoprecipitation**

ChIP assays were carried out according to the protocol described in (Iacovoni et al., 2010). Briefly, 200 µg of chromatin was immunoprecipitated by using 2 µg of anti-γH2AX (Epitomics, 2212-S), anti-P-ATM S1981 (10H11 Cell Signaling), anti-P-DNAPK S2056 (Abcam ab 18192) or without antibody (mock). P-ATM and P-DNAPK antibodies were validated in immunostaining and ChIP (Figure S2). Immunoprecipitated DNA and input DNA were analyzed in duplicate by RT-qPCR using the following primers DSB1 FW TGCCGGTCTCCTAGAAGTTG, REV GCGCTTGATTCCCTGAGT; DSB2 FW GATTGGCTATGGGTGTGGAC, REV CATCCTTGCAAACCAGTCCT. IP efficiencies were calculated as the percent of input DNA immunoprecipitated.

### **ChIP chip and analysis**

For ChIP-chip, 8ng of inputs and samples were amplified as in (Iacovoni et al., 2010), labelled and hybridized on Affymetrix tiling arrays covering human chromosomes 1 and 6. ChIP samples were normalized against the input samples using the Tiling Array analysis Software (bandwidth 300bp), converted to .WIG files using R/Bioconductor software, when necessary, and visualized using the Integrated Genome Browser (bioviz.org)



To plot data with respect to the 24 DSBs induced on chromosome 1 and 6 (Iacovoni et al., 2010), AsiSI site positions were retrieved from the human genome (hg18) and average ChIP-chip signal was computed for 200bp windows spanning 40kb (P-ATM and P-DNAPK) or 2Mb ( $\gamma$ H2AX) surrounding each annotated AsiSI site.

For heatmap representations, average ChIP-chip signal was determined in 500 bp bins for P-ATM and P-DNAPK, and 50 kb bins for  $\gamma$ H2AX, centered on each cleaved AsiSI site using custom R/Bioconductor scripts. The resulting matrix was represented as a heatmap using Java Treeview (<http://www.jtreeview.sourceforge.net>). DSBs were ordered based on the overall  $\gamma$ H2AX level in untreated cells (Figure 3E) or the overall P-ATM levels in 4OHT treated cells (Figure 2E).

### **Repair kinetics and repair fidelity at AsiSI sites.**

Repair kinetics at specific AsiSI induced DSBs were measured as described in (Aymard et al., 2014) by a cleavage assay permitting the capture of unrepaired DSBs, at the indicated times after auxin addition. The full procedure for the cleavage assay has been previously described (Chailleux et al., 2014). Briefly, a biotinylated double-stranded oligonucleotide, cohesive with AsiSI sites, was ligated *in vitro* to genomic DNA after break induction. T4 ligase was heat inactivated at 65°C for 10 min and DNA was fragmented by *Eco*RI digestion at 37°C for 2 h, followed by heat inactivation at 70°C for 20 min. After a preclearing step, DNA was pulled down with streptavidin beads (Sigma) at 4°C overnight, and then washed 5 times in RIPA buffer and twice in TE. Beads were resuspended in 100  $\mu$ L of water and digested with *Hind*III at 37°C for 4 h. After phenol/chloroform purification and precipitation, DNA was resuspended in 100  $\mu$ L of water. Precipitated DNA was quantified for each site by RT-qPCR using the following primers: NHEJ1: FW TCCCCTGTTTCTCAGCACTT, REV CTTCTGCTGTTCTGCGTCCT; NHEJ2: FW GGAAGGAGGGGCTACTAGGG, REV GAAAGCCCCATTCAGTTTGA; NHEJ3: FW ATCGGGCCAATCTCAGAGG, REV GCGACGCTAACGTTAAAGCA; HRIII: FW CCGTCCGTTACGTAGAATGC, REV GGGCGGGGATTATGTAATTT; DSB Figure S1C FW GATTGGCTATGGGTGTGGAC, REV CATCCTTGCAAACCAGTCCT.

For fidelity assays, DIvA cells were treated with 4OHT to induce DSBs for 4h (300nM) followed by an auxin treatment for 4h, in the presence or absence of ATMi (KU55933). The next day, cells were treated again with 4OHT for 4 hours. DNA was extracted and subjected to a cleavage assay as described above.

## **Immunofluorescence**

Detailed methods for immunofluorescence against  $\gamma$ H2AX (JBW301) in D1vA cells have already been described in (Iacovoni et al., 2010). XRCC4 staining was performed according to the protocol described in (Britton et al., 2013). Briefly cells grown on coverslips were incubated twice six minutes in a CSK Buffer (10 mM PIPES pH 7.0, 100 mM NaCl, 300 mM sucrose, 3 mM MgCl<sub>2</sub>) supplemented with TritonX100 0.7% and 0.3mg/ml Rnase A. After PBS washes, cells were fixed with 4% paraformaldehyde and subjected to immunostaining using a standard protocol (Iacovoni et al., 2010). Both  $\gamma$ H2AX (mouse JBW301) and XRCC4 antibodies (Abcam ab145) were used at a dilution of 1:1000. All secondary antibodies were purchased from molecular probes. Image acquisition was performed using MetaMorph on a wide field microscope equipped with a with a cooled charge-coupled device camera (CoolSNAP HQ2), using either a 100X objective (for details) or a X40 objective (for quantification). Quantification were performed using plugins in Image J, measuring the percentage of each nuclei positively stained (above a defined threshold).

For immunofluorescence in MEF, cells were grown on coverslips for 7 days until confluency arrested, preincubated for 30 min with the required inhibitor, treated as indicated and fixed 10 min in ice-cold methanol. Fixed cells were then permeabilized (2 min in PBS-0.2% Triton X-100), blocked (30 min in PBS-5% BSA), incubated with the  $\gamma$ H2AX primary antibody for 1 h in PBS-1% BSA (Millipore, 05-636), washed (3x 5 min in PBS-0.1% Tween 20), incubated for 30 min with the corresponding AlexaFluor-conjugated secondary antibody (1/1000 dilution in 1% BSA-PBS) and washed again as described above. Finally, they were counterstained with DAPI (Sigma) and mounted in Vectashield (Vector Labs).  $\gamma$ H2AX foci were manually counted (double-blind) in 40 cells from each experimental condition.

## **High resolution microscopy**

Fluorescent widefield microscopy was used to produce 3D image of nucleus. The acquisition have been made with a Nikon eclipse Ti E with a 100x microscope objective lenses with numerical aperture equal to 1.49. EMCCD camera Evolve from photometrics has been used (16 $\mu$ m pixel size). For a best respect of Nyquist criterion 2.5 magnification lens was installed after the collection tube lens. High resolution deconvolution was performed using non linear

deconvolution called Richardson lucy algorithm with total variation (TV) regularization (Dey et al., 2006). The algorithm is implemented in the image J software deconvolution lab (<http://bigwww.epfl.ch/algorithms/deconvolutionlab/>). The TV regularization is a constraint which suppresses unstable oscillations while preserving object edges. TV regularization parameter from each image was determined with the method described in (Laasmaa et al., 2011). The experimental Point Spread Function of the microscope (PSF) used for inversion was an average from the 30 isolated experimental PSF. The zero frequency components of the noise was removed in the final PSF.

### **Ripley analysis**

Spot distribution analysis of  $\gamma$ H2AX has been performed in 2D. Spots were identified as performed in (Feuerbach et al., 2002), on a selected slice of an N-SIM acquired image using the spot detector based on Decimated Wavelet Transform available as a plug-in in Icy. A spot detector scale value of 2 was used together with a threshold based on the individual experiment. The spatial analysis used Ripley's K function to robustly analyze the spatial organization of  $\gamma$ H2AX foci. The Ripley K function allows counting the number of  $\gamma$ H2AX points that are closer than a parameter  $r$ . For positive values of the Ripley's K function foci are clustered, while for negative values of the K function, foci are considered as dispersed. For a value around 0, the distribution is considered to be random, following a poisson distribution. Real cluster sizes can be directly inferred from the maximum of the Ripley function by the relation:  $Rc \approx \frac{r_{max}}{1.3}$

### **Time lapse microscopy**

Live cells analysis was performed in a 2-well chamber (Lab-Tek) in 1mL of DMEM supplemented with antibiotics, 10% FCS (InVitrogen) and 25mM HEPES (InVitrogen), at 37°C. Confocal Microscopy was performed with an Andor Revolution Nipkow-disk confocal system installed on a Olympus IX-81, featuring a CSU22 confocal spinning disk unit (Yokogawa) and an EMCCD camera (DU 888, Andor). The system was controlled using the mode "Full but not XY" of Andor Revolution IQ1 software (Andor). Images were acquired using an Olympus 100x objective (Plan APO, 1.4 NA, oil immersion). Single laser lines used for excitation were diode pumped solid state lasers (DPSSL) exciting GFP fluorescence at 488 nm (50 mW, Coherent) and Semrock bi-bandpass emission filter (Em01-R488/568-15). Pixel size was 65 nm. For 3D analysis, Z-stacks images with a 250-nm Z-step were acquired.

Exposure time was adjusted for each individual experiment, but usually set at 100 ms. Txt. files describing the used parameters (numbers of stacks, total time of acquisition, time lapse between images, exposure time, as well as the time after 4OHT treatment) are linked to each Supplemental 4D movies files are available upon request. For illustration shown Figure S5C, maximum projections using Image J were performed to generate 2D movies.

**Movie S1, Related to Figure 5:**

Time lapse microscopy was performed on 4OHT treated 53BP1-GFP DIvA using a spinning disk confocal microscope. Acquisition was started straight after 4OHT treatment, all z stacks were acquired every 2 minutes. Maximum projection was computed with Image J. Full 4D movies are available upon request.

**Movie S2, Related to Figure 5:**

Same as Movie S1

**Movie S3, Related to Figure 5:**

Same as Movie S1, except that acquisition was performed after 2h of 4OHT treatment and every 15 seconds. A magnification of 53BP1 foci ongoing clustering is presented. Related to Figure S5C bottom sequence.

**Movie S4, Related to Figure 5:**

Same as Movie S1, except that acquisition was performed after 2h of 4OHT treatment and every 3 minutes. Related to Figure S5C top sequence.

**Movie S5, Related to Figure 5:**

Same as Movie S1, except that acquisition was performed after 2h of 4OHT treatment and every 3 minutes.

A

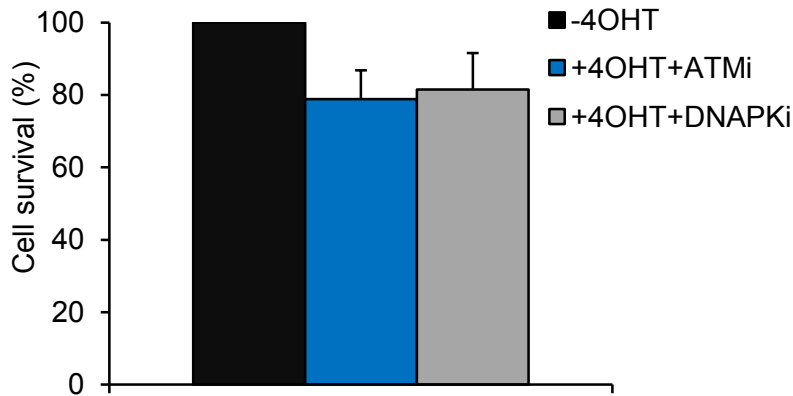

B

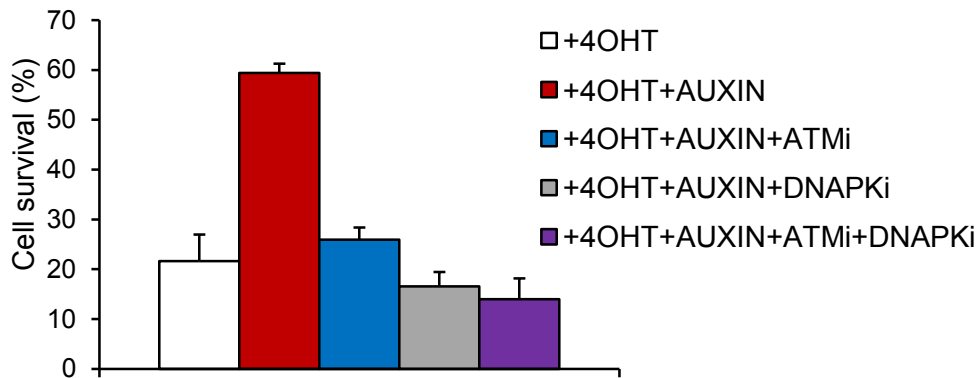

C

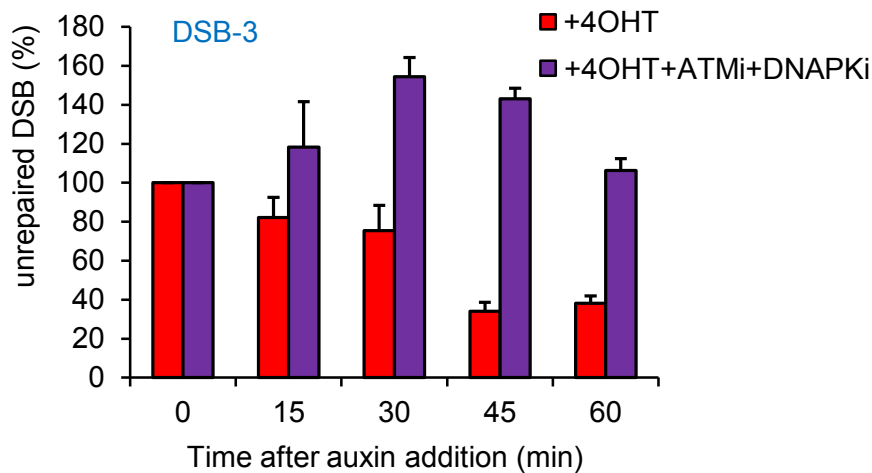

**Figure S1: Effect of PI3K inhibitors on cell survival and DSB repair kinetics, related to Figure1**

A. Clonogenic assays in AID-DIVa cells, in presence of ATM inhibitor (KU55933), DNAPK inhibitor (Nu7441) or without inhibitor, in the absence of damage induction. Colonies were counted ten days after treatments. Average and s.e.m of biological replicates are shown (n=3). B. Clonogenic assays in AID-DIVa cells after 4OHT treatment (4h), followed by auxin treatment (4h) in absence or presence of ATM inhibitor (KU55933), DNAPK inhibitor (Nu7441), or both ATM and DNAPK inhibitors as indicated. Colonies were counted ten days after 4OHT/auxin treatments. Average and s.e.m of biological replicates are shown (n=3). C. Cleavage assay in AID-DIVa cells treated with 4OHT (4h) followed by auxin (4h), in absence or presence of ATM and DNAPK inhibitors, as indicated. Immunoprecipitated DNA was analyzed close to one DSB. The percentage of sites that remain broken after the indicated time of auxin treatment is presented. Average and s.e.m. (n=3, technical replicates) of a representative experiment are shown (out of 2 independent experiments).

## Figure S2, Related to Figure 2

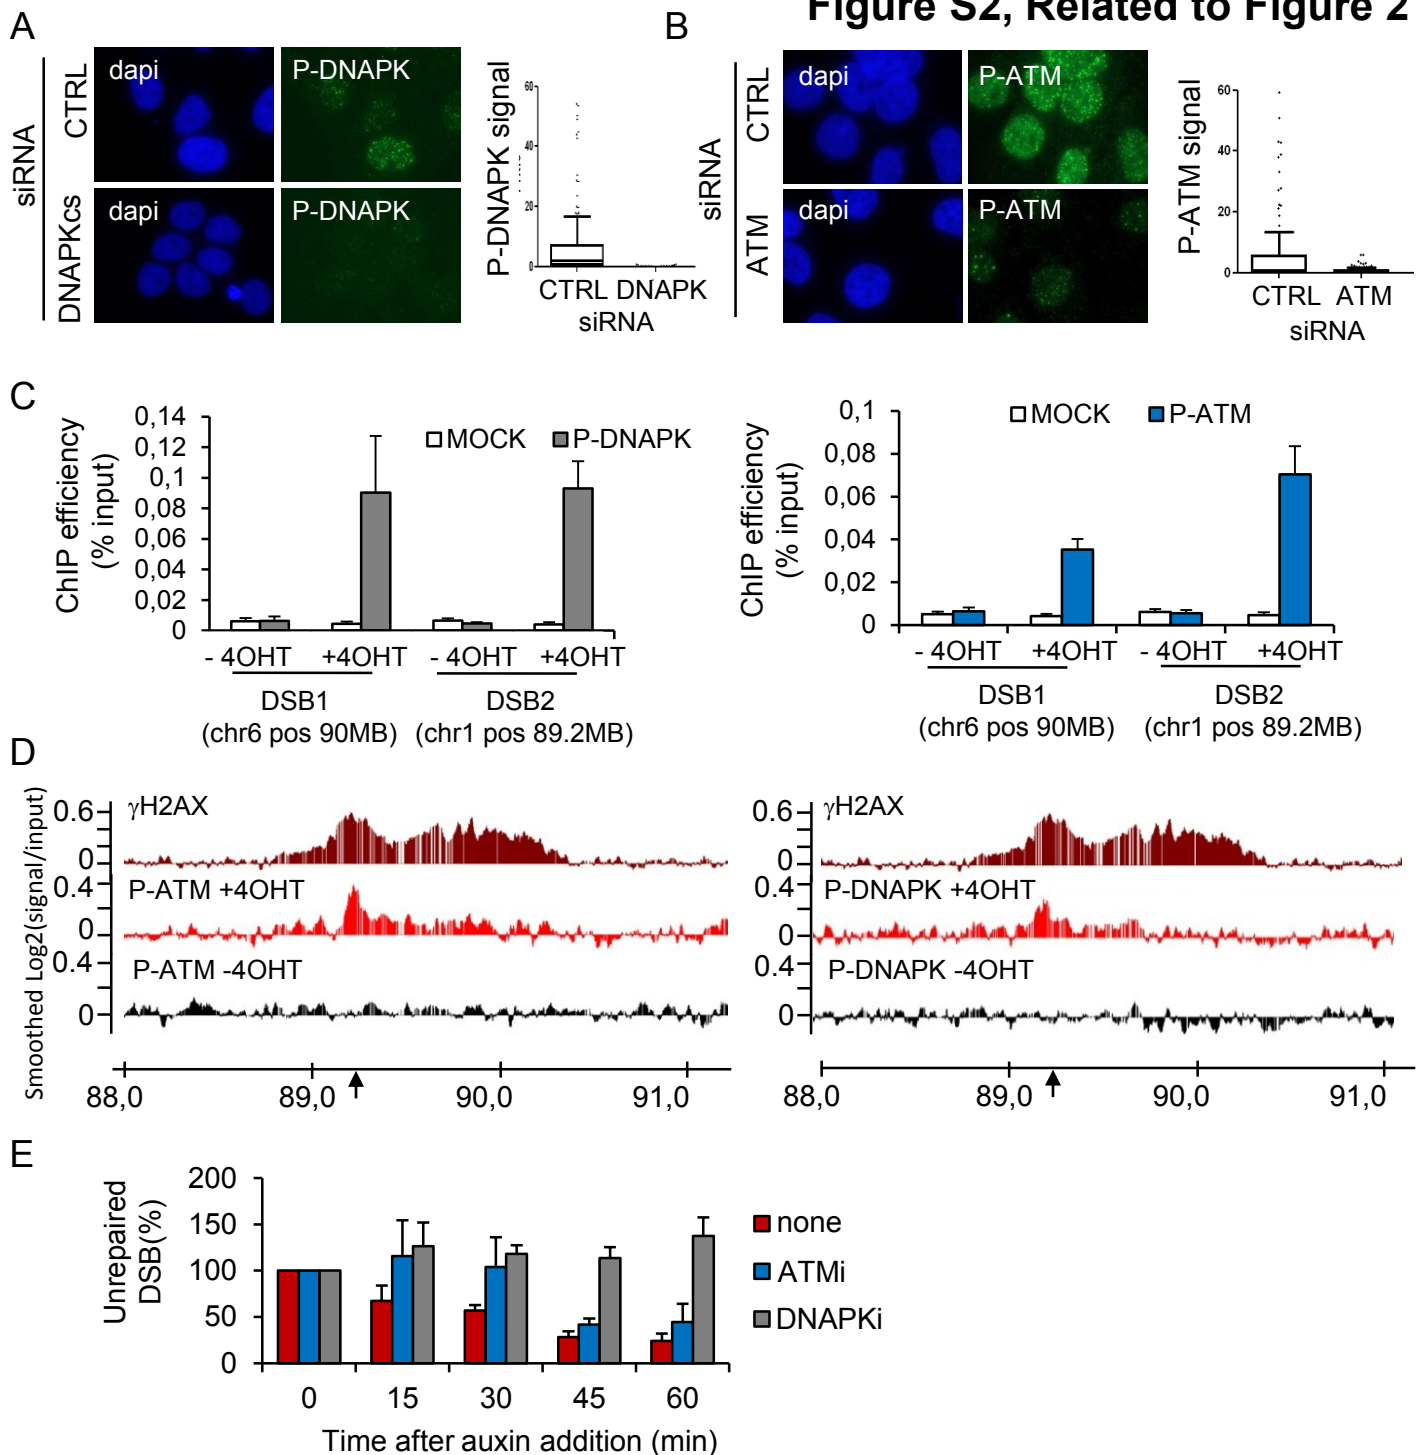

**Figure S2: ChIP-chip profile of activated kinases, related to Figure2**

**A-B** DivA cells were transfected with a siRNA control or against DNA-PK, or ATM for 48h (as indicated), further treated for 4h with 4OHT and stained with the P-DNAPK (S2056) or P-ATM (S1981) antibodies. Quantification are shown on the right. **C.** ChIP against P-ATM (S1981) and P-DNAPK (S2056) were performed in 4OHT treated or untreated DivA cells as indicated. Enrichment were assayed at two AsiSI induced DSB by qPCR. **D** Profiles of both activated kinases before (in black) and after (in red) 4OHT treatment are shown at an AsiSI-induced DSB (indicated by black arrow), on the chromosome 1, where considerable spreading (on roughly 500kb) of the kinases was observed. Positions are indicated in megabases. As a comparison, the  $\gamma$ H2AX profile is also shown (dark red, top panels). **E.** Repair kinetics was investigated at the above DSB, similarly to Figure 1B. Average and s.e.m. (n=3, technical replicates) of a representative experiment are shown (out of 3 independent experiments).

# Figure S3, Related to Figure 4

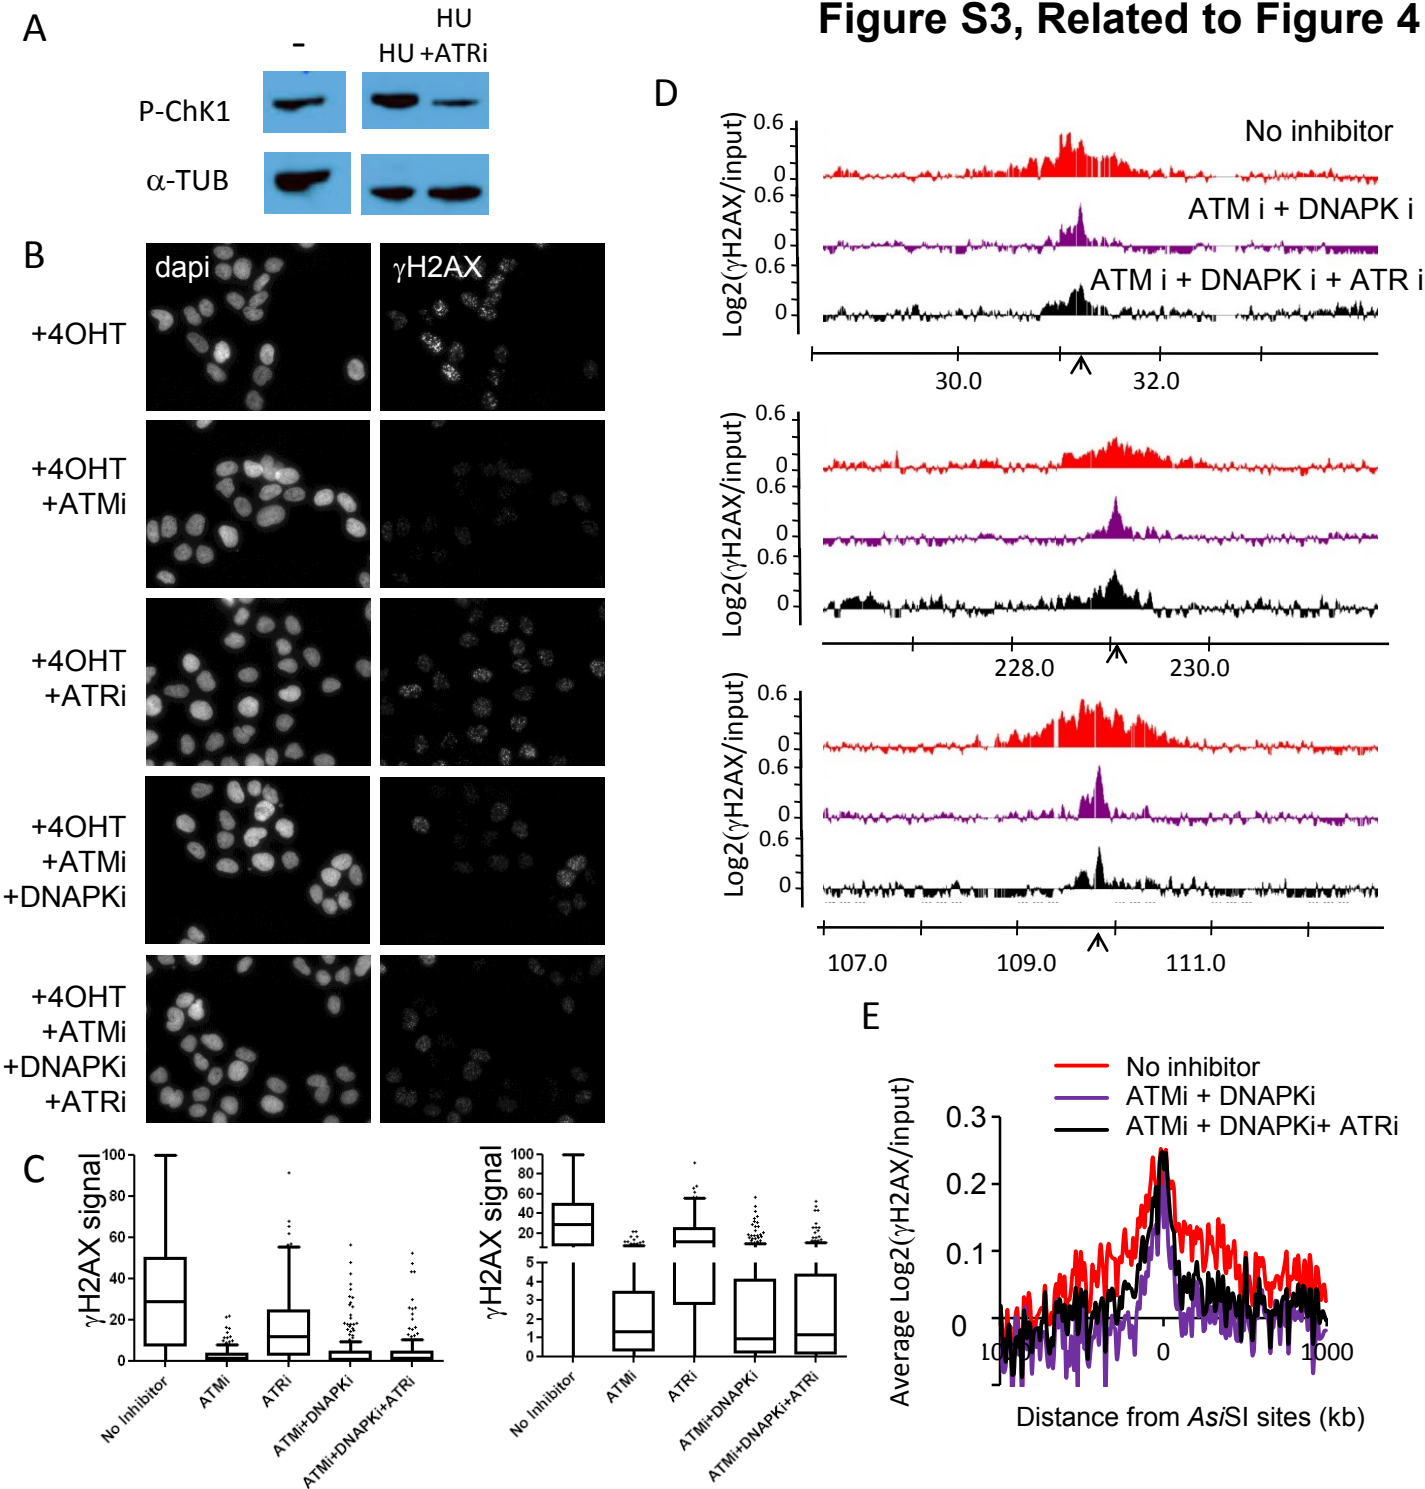

**Figure S3: ATR does not mediate  $\gamma$ H2AX in cells where ATM and DNAPK activities are impaired, related to Figure 4.** **A.** DivA cells were treated with HU and/or ATRi (ETP-46464) as indicated, and subjected to western blot against P-Chk1, to control ATR inhibition by the ATR inhibitor. **B.**  $\gamma$ H2AX staining was performed in DivA cells after 4OHT treatment (4h), in presence of ATR, ATM and DNAPKi inhibitors, as indicated. **C.** Quantification of the  $\gamma$ H2AX staining presented Figure S3B were performed. Right panel: the same graph is presented with a modified y axis for better visualization of the ATMi, and combined inhibitors conditions. **D.**  $\gamma$ H2AX ChIP-chip analyses in DivA cells after 4OHT treatment (4h), in presence of ATM+DNAPK inhibitor or in presence of a combination of ATM, DNAPK and ATR inhibitors, as indicated. Profiles of  $\gamma$ H2AX are shown at three AsiSI-induced DSBs (indicated by black arrows). **E.** Averaged  $\gamma$ H2AX signals in 4OHT treated cells (in red) supplemented with ATM+DNAPK inhibitors (purple) or ATM+DNAPK+ATR inhibitors (black) over a two megabases region flanking cleaved AsiSI sites are shown.



## Figure S4, Related to Figure 4

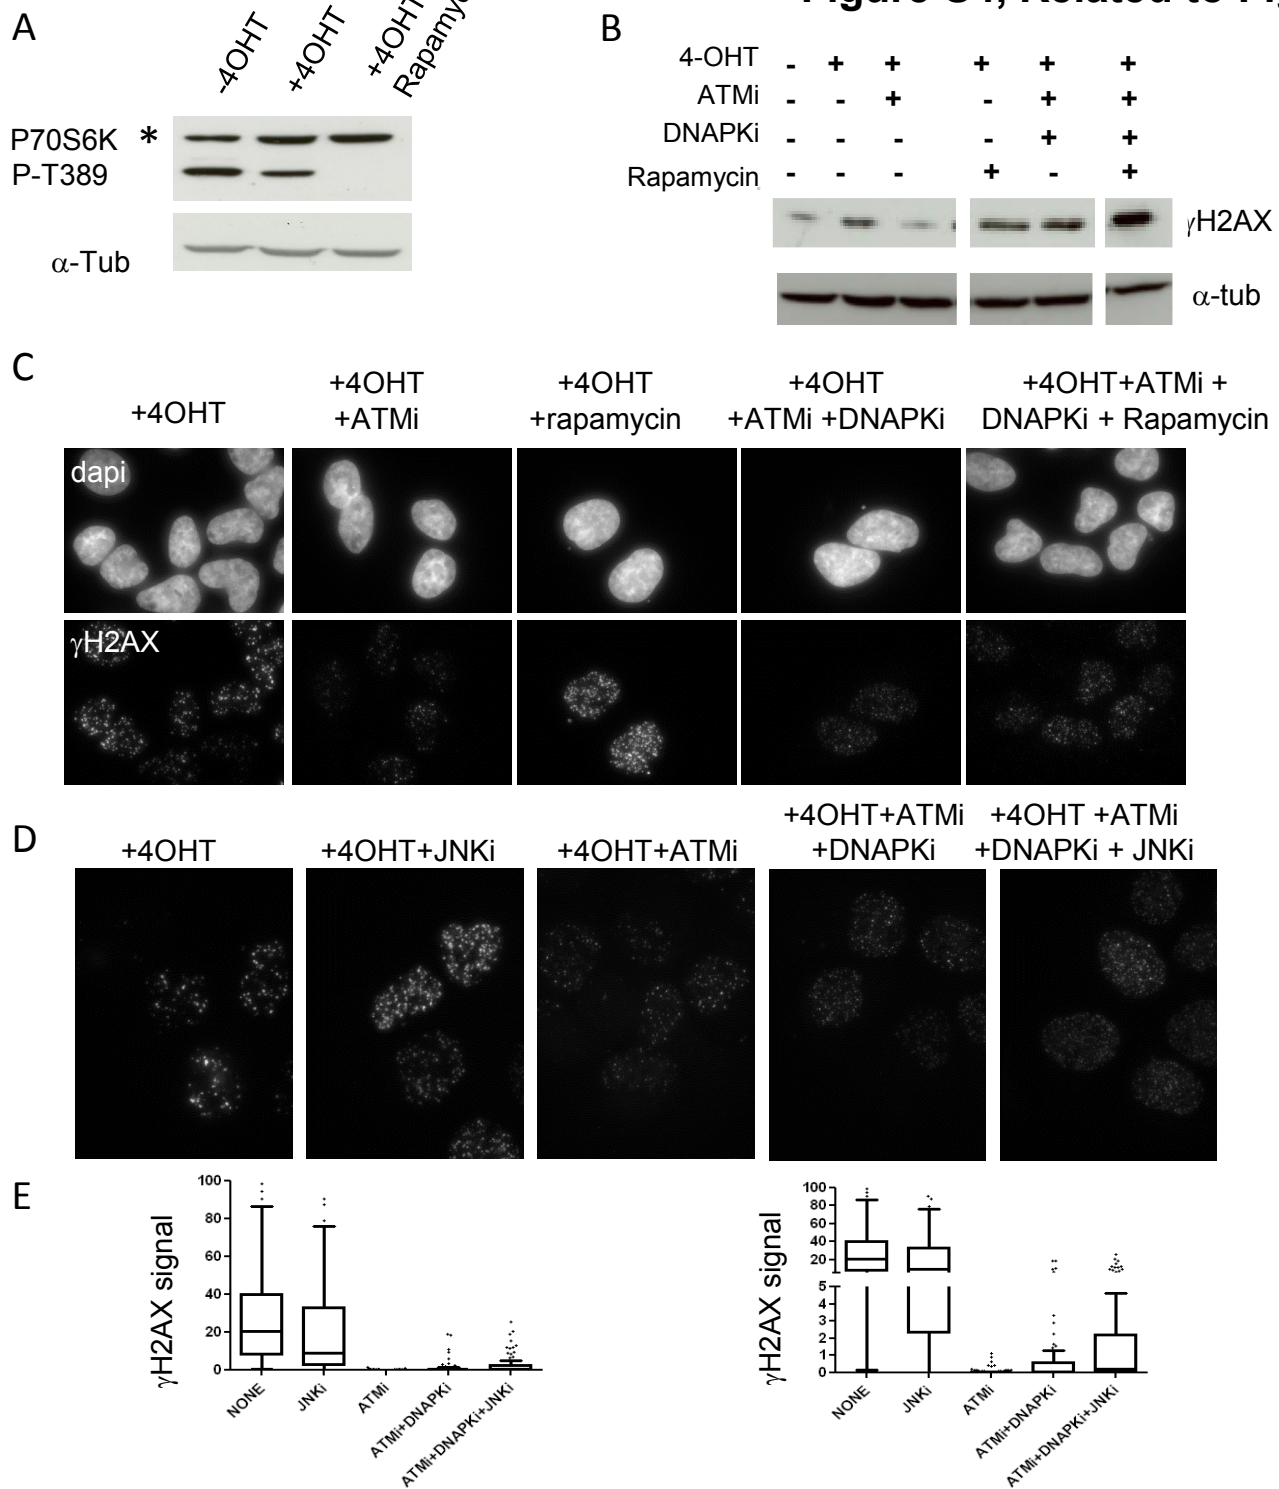

**Figure S4: The mTOR pathway and c-Jun N-terminal Kinase (JNK) do not mediate  $\gamma$ H2AX in cells where ATM and DNAPK activities are impaired, related to Figure 4.**

**A.** DivA cells were treated with 4OHT in presence or absence of rapamycin as indicated and subjected to western blot against P70S6K P-T389 (a known target for mTOR pathway, Cell Signalling, #9205) \* non specific. **B.** DivA cells were treated or not with 4OHT in presence of inhibitors as indicated, and subjected to western blot against  $\gamma$ H2AX and alpha tubulin (loading control). **C.** DivA cells were treated with 4OHT and inhibitors as indicated, and subjected to an immunostaining against  $\gamma$ H2AX. **D.** DivA cells were treated with 4OHT in presence or absence of the indicated inhibitors and subjected to  $\gamma$ H2AX staining. **E.** Quantification of  $\gamma$ H2AX signal. A representative experiment is shown. Right panel: same box plot except for the y axis, to better visualize variations between ATMi, ATMi+DNAPKi and ATMi+DNAPKi+JNKi conditions.

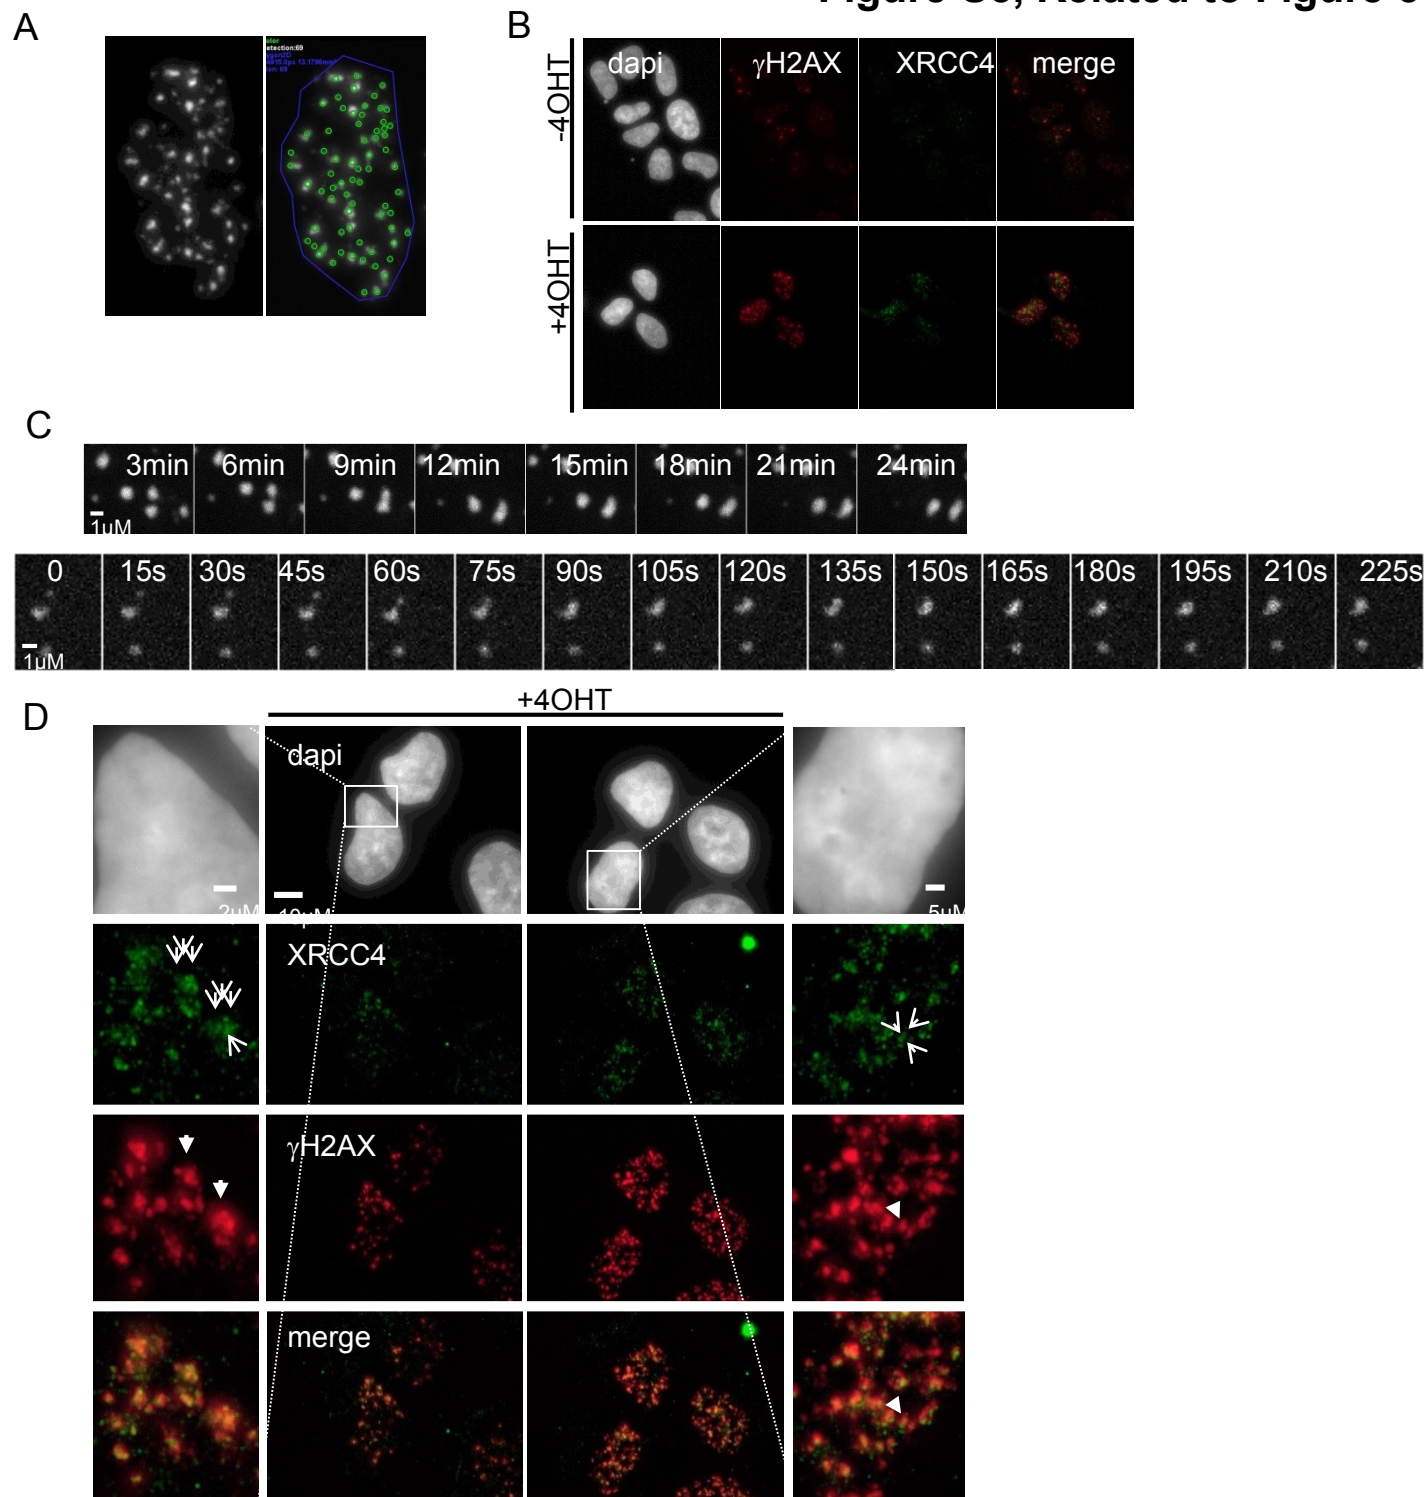

**Figure S5: Analyses of AsiSI induced foci by microscopy, related to Figure 5**

**A.**  $\gamma$ H2AX staining in 4OHT treated DivA cells revealed a reduced number of foci compared to the amount of  $\gamma$ H2AX domains linearly depicted on chromosomes by ChIP-seq. Images were acquired using a wide field microscope, and foci were manually counted on more than 20 cells. **B.**  $\gamma$ H2AX and XRCC4 staining were performed in 4OHT treated DivA cells, untreated (left panels) or treated with 4OHT for 4 hours, according the protocol described in (Britton et al, 2013). **C.** Time lapse acquisition of 53BP1-GFP foci in 4OHT treated DivA cells. Movies are available as Supplemental material. Legends for Movies are available in the Supplemental Experimental Procedure file. **D.**  $\gamma$ H2AX and XRCC4 staining were performed in 4OHT treated DivA cells, and images were acquired using a wide field microscope (X100 objective). Two magnifications are presented on left and right panels. Arrows indicates  $\gamma$ H2AX foci that contain more than one XRCC4 spot.
